1 **Variation of female pronucleus reveal oocyte or embryo abnormality: An expert**  
2 **experience deep learning of non-dark box analysis**

3  
4  
5 Jingwei Yang<sup>1,2\*</sup>, Yikang Wang<sup>4\*</sup>, Chong Li<sup>1,2</sup>, Wei Han<sup>2,3</sup>, Weiwei Liu<sup>2,3</sup>, Shun  
6 Xiong<sup>2,3</sup>, Qi Zhang<sup>1,2</sup>, Keya Tong<sup>2,3</sup>, Guoning Huang<sup>1,2,3#</sup>, Xiaodong Zhang<sup>1,2,3#</sup>

7  
8  
9  
10 <sup>1</sup>Chongqing Key Laboratory of Human Embryo Engineering, Chongqing, China

11 <sup>2</sup>Chongqing Clinical Research Center for Reproductive Medicine, Chongqing, China

12 <sup>3</sup>Reproductive and Genetic Institute, Chongqing Health Center for Women and  
13 Children, Chongqing, China

14 <sup>4</sup>Department of Mechatronics, Graduate School of Medicine, Engineering, and  
15 Agricultural Sciences, University of Yamanashi, Japan

16  
17 \*These authors contributed equally to this work.

18  
19  
20  
21  
22 #Corresponding author:

23  
24 Xiaodong Zhang

25 Email: [zhangxd207@sina.com](mailto:zhangxd207@sina.com)

26  
27 Guoning Huang

28 Email: [gnyuang217@sina.com](mailto:gnyuang217@sina.com)

29  
30 Reproductive and Genetics Institute

31 Chongqing Health Center for Women and Children

32 No.64 Jin Tang Street, Yu Zhong District, Chongqing 400013, China

33

34

35 **Background:** Pronuclear assessment appears to have the ability to distinguish good  
36 and bad embryos in the zygote stage, but paradoxical results were obtained in clinical  
37 studies. This situation might be caused by the robust qualitative detection of the  
38 development of dynamic pronuclei. Here, we aim to establish a quantitative  
39 pronuclear measurement method by applying expert experience deep learning from  
40 large annotated datasets.

41 **Methods:** Convincing handle-annotated 2PN images (13419) were used for deep  
42 learning then corresponded errors were recorded through handle check for subsequent  
43 parameters adjusting. We used 790 embryos with 52479 PN images from 155 patients  
44 for analysis the area of pronuclei and the pre-implantation genetic test results.  
45 Establishment of the exponential fitting equation and the key coefficient  $\beta 1$  was  
46 extracted from the model for quantitative analysis for pronuclear(PN) annotation and  
47 automatic recognition.

48 **Findings:** Based on the female original PN coefficient  $\beta 1$ , the chromosome-normal  
49 rate in the blastocyst with biggest PN area is much higher than that of the blastocyst  
50 with smallest PN area (58.06% vs. 45.16%, OR=1.68 [1.07–2.64];  $P=0.031$ ). After  
51 adjusting coefficient  $\beta 1$  by the first three frames which high variance of outlier PN  
52 areas was removed, coefficient  $\beta 1$  at 12 hours and at 14 hours post-insemination,  
53 similar but stronger evidence was obtained. All these discrepancies resulted from the  
54 female propositus in the PGT-SR subgroup and smaller chromosomal errors.

55 **Conclusion(s):** The results suggest that detailed analysis of the images of embryos  
56 could improve our understanding of developmental biology.

57 **Funding:** None

58

59

60 **Key words:** pronuclei identification; artificial intelligence; expert experience deep  
61 learning; mathematical model; pre-implantation genetic test

## 62 **Introduction**

63 Human embryos begin with the fertilization of an oocyte by a spermatozoon. A  
64 spermatozoon penetrates into the oocyte, causing a series of events that can be  
65 observed through a microscope, such as the cortical granule reaction, which prevents  
66 poly-fertilization, extrusion of the second polar body, and the formation and migration  
67 of two separate pronuclei that contain maternal and paternal chromosomes,  
68 respectively. The male and female pronuclei form in proximity of the zygote's surface.  
69 Then, they need to move inwards in order to unite the paternal and maternal  
70 chromosomes on the first mitotic spindle (Scheffler K et al., 2021). During pronucleus  
71 (PN) migration from the periphery inward to the center of the zygote, the areas of  
72 both pronuclei increase gradually.

73 Phenomena related to pronuclear and nucleolar movements were first described  
74 by Wright et al.(Wright G et al., 1990). Notions including pronuclear alignment, and  
75 uneven/even numbers of chromosomes in the pronucleus and nucleolus precursor  
76 bodies (NPBs) have been expressed in more distinct pronuclear scores and used as a  
77 means to select embryos based on the Z-score (Scott LA et al., 1998). The scores have  
78 been correlated with improved embryo development (Balaban B et al., 2001; Rienzi L  
79 et al., 2002), increased pregnancy and implantation (Tesarik J et al.,2000; Zollner U et  
80 al.,2002;Jaroudi K et al., 2004), and embryonic chromosomal content (Gianaroli L et  
81 al., 2007; Gámiz P et al., 2003; Roos Kulmann MI et al., 2020) after the  
82 pre-implantation genetic test (PGT). However, some studies have disputed the effect  
83 of pronuclear scores for in vitro fertilization (IVF) or intracytoplasmic sperm injection  
84 (ICSI) (Nicoli A et al., 2013; Aydin S et al., 2011; Bar-Yoseph H et al., 2011), even if  
85 0PN- and 1PN-derived blastocysts have similar neonatal results as 2PN-derived  
86 blastocysts (Doody KJ. 2021; Li M et al., 2021):

87 In theory, the pronuclear stage could be the only way to mirror the internal quality  
88 of the chromosomal integrity of the oocyte and the spermatozoon (Kuliev A et al.,  
89 2011;Lamb NE et al., 1996; Roos Kulmann MI et al., 2020). Meanwhile,  
90 developmental details such as disorder cleavage, embryonic fragment extrusion,  
91 uneven blastomeres, and abnormal morphokinetics during the post-zygote stage  
92 (cleavage, morula, and blastocyst stage) might reflect embryonic developmental  
93 dysfunction, mainly aneuploidy and mosaicism (Alpha Scientists in Reproductive M,  
94 2011; Coticchio G et al., 2018; Munné S, 2006; Daughtry BL et al., 2019; Chavez SL  
95 et al., 2012). Due to the vague standard of methods (more than 6 scoring systems) in  
96 current pronuclear assessments (Nicoli A et al., 2013), the effect of pronuclear scores  
97 remains unclear. The dynamic character of the pronucleus, incongruent practice in  
98 IVF laboratories such as fertilization time and checking time, and the heterogeneity in  
99 patients make efficient qualitative classification for pronuclear assessment impossible.

100 Here, we aim to construct a computer-assisted algorithm for quantitative analysis  
101 for pronuclear assessment in ICSI patients from time-lapse incubators and test its  
102 efficacy in the diagnosis of chromosomal integrity in oocytes or embryos.

103  
104  
105

## 106 Methods and materials

107 The deep learning images were obtained from the intracytoplasmic sperm  
108 injection (ICSI) cycles of 184 infertile couples requiring assisted reproductive  
109 technology (ART) therapy performed in 2019–2020 at the Reproductive and Genetic  
110 Institute of Chongqing in China. Infertility was diagnosed according to either female  
111 or male chromosomal/genomic abnormality (pre-implantation genetic test for  
112 chromosomal structural rearrangements [PGT-SR]), spontaneous abortion history  
113 (pre-implantation genetic test for aneuploidies [PGT-A]), unexplained reason  
114 (PGT-A), and tubal and pelvic factors combined with male chromosomal/genomic  
115 abnormality for ICSI and subsequent PGT-A. The study was approved by the local  
116 ethics committee. In total, 155 couples with 790 blastocyst-stage embryos were  
117 included in the final analysis, with 412 and 378 embryos in the PGT-A and PGT-SR  
118 subgroups, respectively (Figure 1).

119 Fig.1. Flow chart  
120

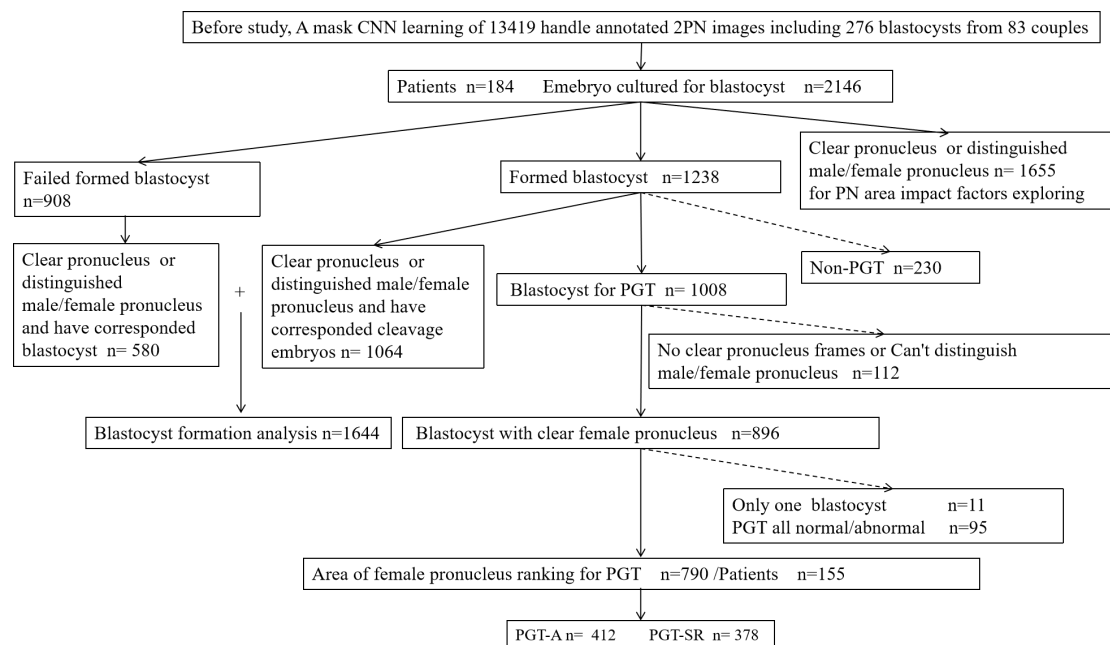

121

## 122 Practices in ART

123 Before the ovaries were stimulated with recombinant FSH (Gonal-F, Merck  
124 Serono, Switzerland), downregulation was performed using a GnRH agonist  
125 (Decapeptyl; Ferring, Switzerland). Next, hCG (Ovidrel; Merck Serono, Italy) was  
126 administered when at least three leading follicles attained a mean diameter of >18  
127 mm.

128 The flexible GnRH antagonist regimen included rFSH (Gonal-F; Serono,  
129 Aubonne, Switzerland) injection starting on day 2 of the menstrual cycle. The starting  
130 dose of rFSH was 75–300 IU daily and was customized according to the patient's age,  
131 body mass index, antral follicle count, and baseline E2, P, FSH, and LH  
132 concentrations. Cetrorelix acetate (Cetrotide; Merck Serono Ltd., Aubonne,  
133 Switzerland) was used as the GnRH antagonist. Treatment with rFSH and cetrorelix  
134 acetate was continued until the day of the final oocyte maturation trigger.

135 Transvaginal oocyte retrieval was performed 36h after hCG injection.  
136 Cumulus-enclosed oocytes were collected in 2.5 ml of IVF medium (G-IVF, Vitrolife  
137 Sweden AB, Sweden) and incubated at 37°C under 5% O<sub>2</sub> and 6% CO<sub>2</sub> conditions for  
138 insemination.

139 Furthermore, sperm cells with normal morphology were selected, immobilized,  
140 and then microinjected into the oocyte cytoplasm 2–4 h after oocyte retrieval. Injected  
141 oocytes were then transferred into G-1 (Vitrolife, Sweden) medium droplets and  
142 placed into microwells of a custom-made well-of-the-well dish (EmbryoSlide®,  
143 Vitrolife Sweden AB, Sweden) containing 50 µl of equilibrated G-1 (Vitrolife Sweden  
144 AB, Sweden) microdroplets over the microwells and covered with 2.5 ml of Ovoil  
145 (Vitrolife Sweden AB, Sweden). Subsequently, the dish was immediately stored in a  
146 time-lapse (TL) system (EmbryoScope™, Vitrolife, Göteborg, Sweden). After 3 days  
147 of culture, the embryos were extracted and transferred to a new well-of-the-well dish  
148 containing 50 µl of equilibrated G-2 (Vitrolife Sweden AB, Sweden) microdroplets  
149 over the microwells and covered with 2.5 ml of Ovoil (Vitrolife Sweden AB, Sweden).  
150 The TL image acquisition was set every 10–15 min at seven different focal planes for  
151 each embryo. Images (1280 × 1024 pixels) were acquired using a Leica 20 × 0.40  
152 LWD Hoffman Modulation contrast objective specialized for 635-nm illumination.  
153 Transferable blastocysts were defined as follows: at least in the blastocyst stage at day  
154 5 (120 h after ICSI) with moderate expansion, having easily discernible tightly  
155 compacted inner cell mass (ICM), and having trophectoderm (TE) either in many  
156 cells forming a cohesive epithelium or in few cells forming a loose epithelium.

157

158 TL setting

159 The data are multi-view Hoffmann modulation contrast (HMC) microscopic  
160 images of developing cells in 11 different focal segments (–75, –60, –45, –30, –15, 0,  
161 15, 30, 45, 60, 75) taken every 15 minutes. HMC is a kind of oblique lighting  
162 technology commonly used in IVF (Hoffman R et al.,1975). When oblique light  
163 irradiates the sample, it refracts and diffracts. The light line generates different  
164 shadows through the objective lens optical density regulator, so that the surface of the  
165 transparent sample produces a light and shade difference in order to enhance the  
166 contrast. The diameter of EmbryoSlide® (Vitrolife, Switzerland) is 250 µm. Therefore,  
167 the total area of the well was 49062.5 µm<sup>2</sup>. We measured the number of pixels of the  
168 well of the culture dish in all the time-lapse images. The number of pixels inside the  
169 well was 16077.98 ± 192.35. The relationship between a pixel and its actual size was  
170 1 pixel = 0.3275 µm<sup>2</sup>(Zhao M et al.,2021).

171

172 Establishment of the algorithm for quantitative analysis for pronuclear assessment

173

174 (i) Pronuclear annotation and automatic recognition and labeling

175 For the accurate measuring of PN edge and area, a pre-processing of TL images,  
176 a Laplacian-based method that could confirm the clearest focal plane from the 11  
177 Z-stack images(Cai D et al.,2006; Belkin, M et al.,2005) was employed (Figure 2A).  
178 Then, expert experience features training for recognizing perivitelline space and PN

179 was performed by a mask region-convolutional neural network (Mask R-CNN),  
180 which allowed us to easily estimate PN poses in the same framework (He K et  
181 al.,2020). An abandoned mechanism was introduced to automatic pronucleus  
182 recognition, and any abnormal images (0, 1, 3, or more than 3PN) were discarded.

Fig. 2. AI automatic recognition in PNs

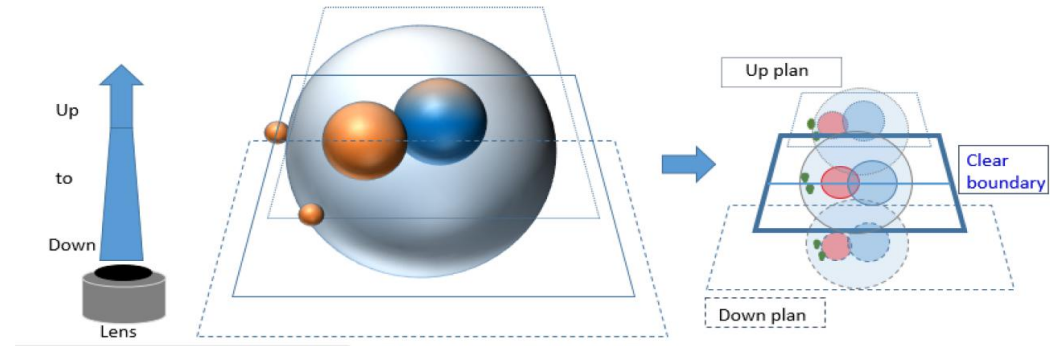

(A). Pronuclear annotation and automatic recognition and labeling by AI.

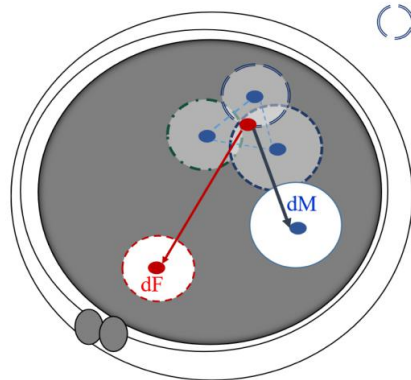

○ ○ ○ Representation of the three positions of male PN ♂ (pronucleus) before the second PN appears

- The male pronuclear centroids
- The female pronuclear centroids
- The distances of the centroid (Cpm) belonging to three pre-existing male PNs ♂ to the visible centroid of the male PN
- The distances of the centroid (Cpm) belonging to three pre-existing male PNs ♂ to the visible centroid of the female PN

(B). The rules to distinguish pronuclei.

184 (ii) Distinguishing female and male pronuclei

185 Normally, two separate pronuclei appear at different times and positions inside  
186 the perivitelline space. Three main approaches can be employed for PN classification.  
187 First, the position of two separate pronuclei can be considered. The female pronucleus  
188 is closer to the second polar body (PB) than the male pronucleus. Second, the male  
189 pronucleus appears earlier than the female pronucleus, but the sequence of pronuclear  
190 appearance is hard to differentiate sometimes due to the image quality. Third, male  
191 pronuclei are larger than female pronuclei in the early zygote stage (Wiker S et  
192 al.,1990). However, due to the inherent limitations in automatic labeling, potential  
193 inaccurate labeling will be ignored in data outputting; the simpler the annotation, the  
194 higher the efficacy that might be obtained in practice. Thus, the PB was not employed  
195 as a feature for machine learning but for following handle checking and correction  
196 (Figure 3A, type and proportion). Only the second and third methods were employed  
197 to distinguish pronuclei and for automatic PN identification, and the second method  
198 was employed prior to the third method for automatic PN identification (Figure 2B).  
199 All pronuclear identifications by computer were confirmed and corrected by a senior  
200 embryologist, who did not know the PGT results.

201



Fig.3.The statement of PN developmental model and adjustment of coefficient

A.

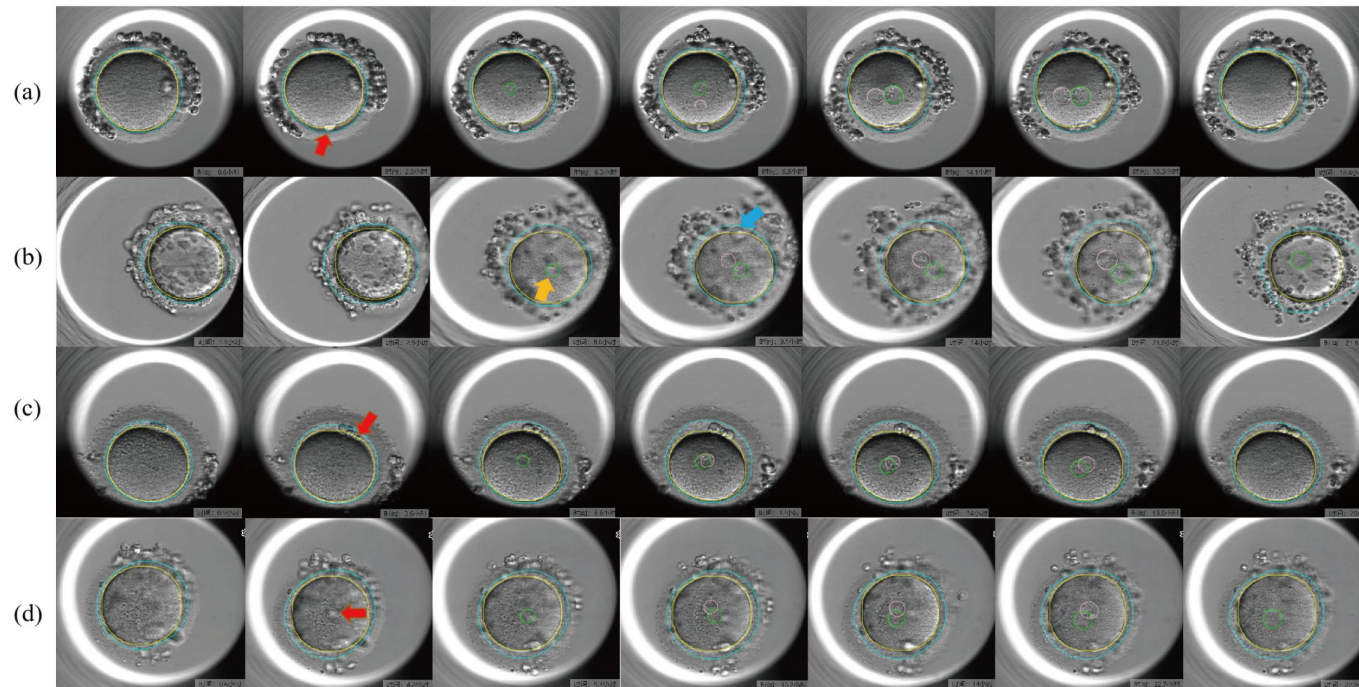

- (a) Easy PN distinguished frames, clear PB2 and suitable distances of female and male PN to PB2 (Proportion:75%) .
- (b) Difficult PN distinguished frames due to the cumulus cells disturbance (Proportion:6%) .
- (c) Difficult PN distinguished frames due to the overlap of female and male PNs (Proportion:5%) .
- (d) Difficult PN distinguished frames due to the equidistance of female and male PNs to PB2 (Proportion:14%) .

(A).The identification of polar body (PB) and female/male PN handle checking

202  
203

Fig.3.The statement of PN developmental model and adjustment of coefficient

B.

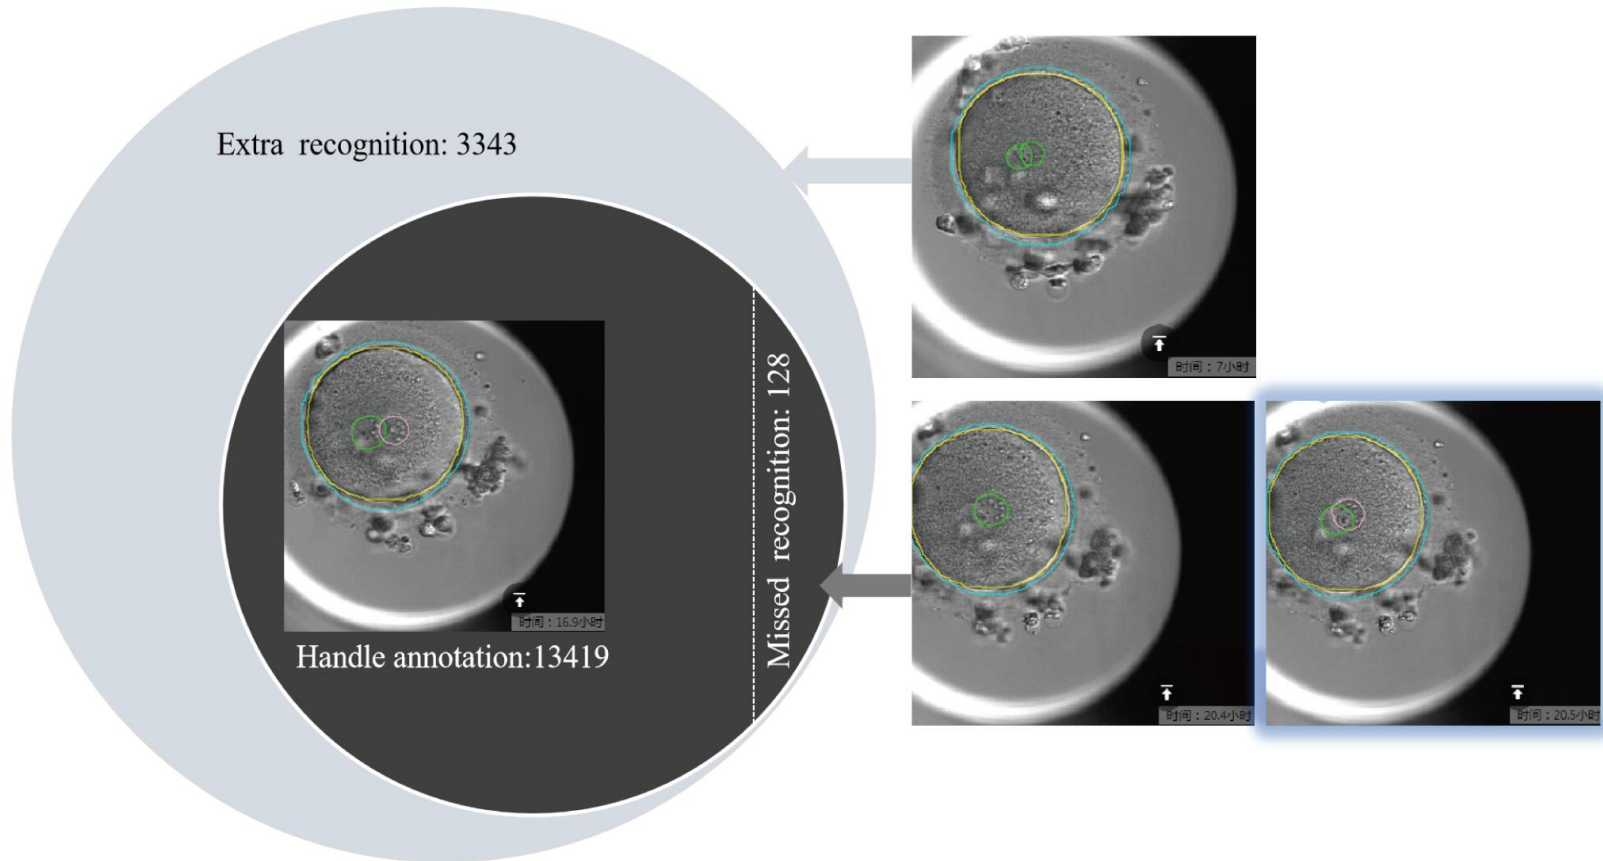

(B)The frames of AI automatic recognition and handle annotation.

205 (iii) The pronuclear labeling stability  
 206 In practice, after the orientation of female and male pronuclei, AI might produce  
 207 errors when separately labeling and categorizing female or male PNs, so vector  
 208 calculus discrimination through cosine similarity ( $\cos\theta > 0$ ) was performed for PN  
 209 location insurance in subsequence images (Figure 2C-a).

Fig. 2. AI automatic recognition in PNs

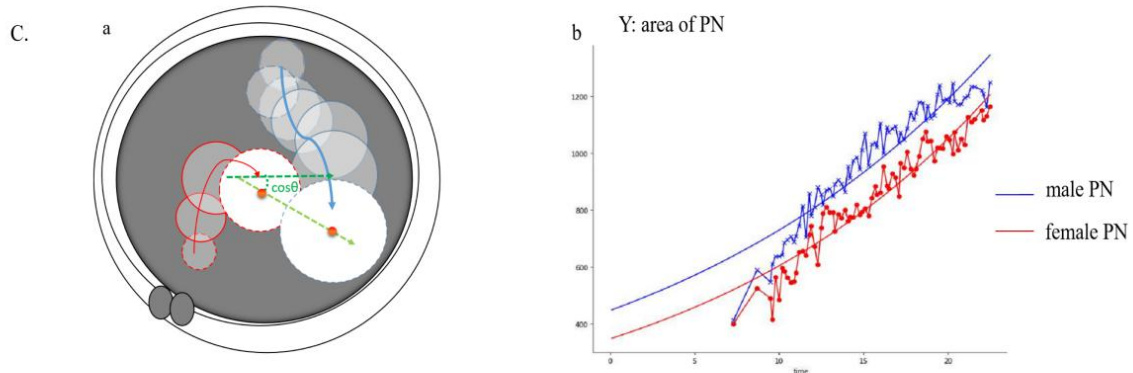

a. Pronuclear formation until nuclear envelope breakdown, showing the entire process of pronuclear migration and envelope enlargement in the human zygote. Blue represents the male PN and red the female PN  $\cos\theta$  is the residual spin value between the lines through the center of the PN circle in each consecutive frame.  $\cos\theta > 0$  was mandatory for PN location insurance.  
 b. Normally, the difference in area between male and female PNs will exist from PN appearance until disappearance. This means that larger or smaller PNs will consistently exist and that the PN's sex could be determined in the early zygotic stage. The curves of both male and female PNs were established first, and female and male curves were distinguished later.

(C). The pronuclear labeling stability.

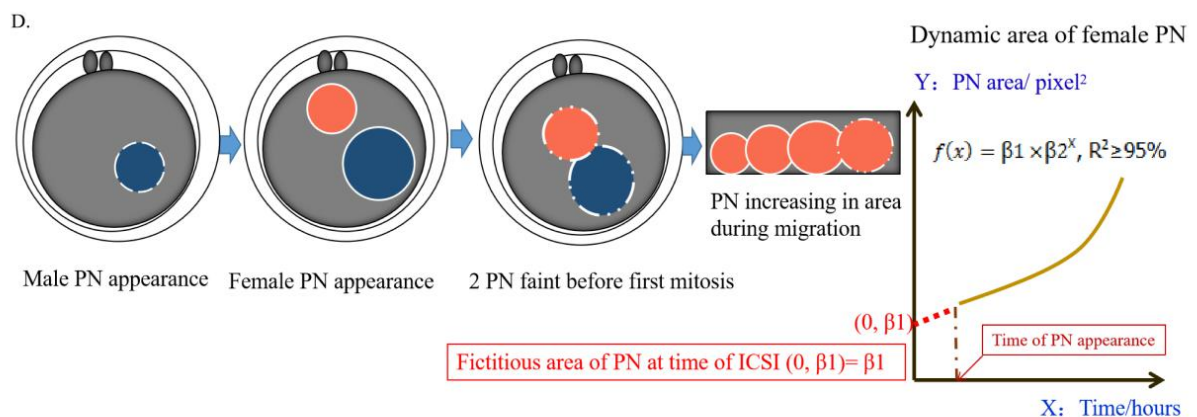

After distinguishing female from male PNs, parameters of female PNs were extracted by the software ( $\beta_1$  and  $\beta_2$ ).  $\beta_1$  represents the fictitious area of the PN at the time of ICSI and  $\beta_2$  represents PN development.

210 (D). Explanation of coefficients in the models.

211 (iv) Exponential model for coefficient extraction  
 212 Mathematical models were employed to describe the dynamic nature of  
 213 pronuclear development, including linear, logarithmic, cosine, quadratic, and  
 214 exponential functions. Finally, an exponential fitting equation (Figure 2C-b)  $f(x) =$   
 215  $\beta_1 \times \beta_2^x$  was employed and the key coefficient  $\beta_1$  was extracted from the model (for  
 216 all others,  $R^2 < 90\%$ ). The fitting degree (coefficient of correlation,  $R^2$ ) in the  
 217 exponential model ranged from 98% to 99.99%.

218

219 (v) Explanation of coefficients in mathematical models

220 The high value of  $R^2$  implies that the development of the PN (from appearance to  
221 disappearance) complies with the exponential mathematical model.  $\beta_1$  represents the  
222 fictitious area of the PN at the time of ICSI ( $f(0) = \beta_1 \times \beta_2^0$ , where  
223 ( $f(\text{time of ICSI}, t = 0) = \beta_1 \times 1$  and  $\beta_2^0 = 1$ ) and  $\beta_2$  represents the PN development  
224 trend (Figure 2D). From this model, any value of the PN area (from 6 to 22 hours  
225 after ICSI) could be obtained. However, because  $\beta_2$  was approximately 1 (original  $\beta_2$   
226 mean  $\pm$  SD:  $1.04 \pm 0.017$ , range 1.01 to 1.11), the object of the study was  $\beta_1$ .

227

228 Chromosomal detection in blastocyst-stage embryos

229 On day 5 (120 h after ICSI), embryos with visible blastocoele were considered as  
230 blastocysts without taking quality in consideration.

231 Transferable blastocysts were defined as follows: at least in the blastocyst stage at  
232 day 5 with moderate expansion, having easily discernible tightly compacted inner cell  
233 mass (ICM) and having trophectoderm (TE) either in many cells forming a cohesive  
234 epithelium or in few cells forming a loose epithelium.

235 Several TE cells were extracted for biopsy using mechanical blunt dissection  
236 (Yang D et al., 2020). Following biopsy, the cells were placed into 0.2-mL thinly  
237 walled tubes, which were sealed and frozen by placing them in a freezer at  $-20^\circ\text{C}$   
238 prior to genetic screening. Single-cell, whole-genome amplification (WGA) with  
239 multiple annealing and looping-based amplification cycles (MALBAC) was used.

240 We performed WGA on cleavage-stage blastomeres using MALBAC following  
241 the manufacturer's protocol (Catalog No. YK001B; Yikon Genomics).

242 Cells were lysed by heating (20 min at  $50^\circ\text{C}$  and 10 min at  $80^\circ\text{C}$ ) in 5  $\mu\text{L}$  of lysis  
243 buffer. Then, 30  $\mu\text{L}$  of freshly prepared pre-amplification mix was added to each tube  
244 and the mixture was incubated at  $94^\circ\text{C}$  for 3 min. Next, DNA was amplified using 8  
245 cycles of 40 s at  $20^\circ\text{C}$ , 40 s at  $30^\circ\text{C}$ , 30 s at  $40^\circ\text{C}$ , 30 s at  $50^\circ\text{C}$ , 30 s at  $60^\circ\text{C}$ , 4 min at  
246  $70^\circ\text{C}$ , 20 s at  $95^\circ\text{C}$ , and 10 s at  $58^\circ\text{C}$  and immediately placed on ice. We then added  
247 30  $\mu\text{L}$  of the amplification reaction mix to each tube and incubated the mixture at  
248  $94^\circ\text{C}$  for 30 s, followed by 17 cycles of 20 s at  $94^\circ\text{C}$ , 30 s at  $58^\circ\text{C}$ , and 3 min at  $72^\circ\text{C}$ .

249 Low-coverage ( $0.3\times$ ), genome-sequenced MALBAC products were purified  
250 using a DNA purification kit to construct our DNA library.

251

252 Chromosomal error definition

253 "Chromosomal-normal" was defined as follows: subsequently developed  
254 embryos (blastocysts) were euploid, without genomic disorders of deletions and/or  
255 duplications (including microdeletions and/or -duplications), i.e., 46 XN.

256 "Sole mosaic" was defined as follows: subsequently developed embryos were  
257 partial cells with normal chromosomes and the others with abnormal chromosomes  
258 either with aneuploidy or without genomic disorders of deletions and/or duplications,  
259 i.e., 46XN, + mosaic (22) (33%) or 46 XN, dup (16) (p13.3p13.13) (5.7 Mb) (mos,  
260 50%).

261 Because gametes' chromosomal abnormalities should not be the source of "sole

262 mosaic,” embryos with sole mosaic forms were considered mitotic chromosomal  
263 separation errors (Zhang X et al.,2021). Thus, in this study, “chromosomal-normal”  
264 and “sole mosaic” were included into the same group in the results.

265 “Sole aneuploidy” was defined as follows: subsequently developed embryos were  
266 aneuploid without any other errors, i.e., 47, XN, +22( $\times 3$ ).

267 “Sole deletion and/or duplication” indicates that embryos possess small ( $>10$  Mb)  
268 or submicroscopic genomic deletions and/or duplications (1 kb to 10 Mb) without  
269 mosaic forms, e.g., 46, XN, dup (16) (p13.3p13.13) (5.7 Mb).

270 “Aneuploidy with errors” includes aneuploidy with any other solely  
271 chromosomal errors, i.e., 47, XN, +22( $\times 3$ ), dup (16) (p13.3p13.13) (5.7 Mb) or 47,  
272 XN, +22( $\times 3$ ), +mosaic (22) (33%).

273 “Euploidy with errors” includes “sole deletion and/or duplication” euploidy with  
274 any mosaic forms, i.e., 46, XN, dup (16) (p13.3p13.13) (5.7 Mb), +mosaic (22)  
275 (33%).

276 “Complex chromosomal errors” indicates aneuploidy with chromosomal deletion  
277 and/or duplication and mosaic forms, e.g., 45, XN, (-21), +4q (q12q31.1,  $\sim 89$  Mb,  $\times 3$ ),  
278 9p (p20p21.1,  $\sim 32$  Mb,  $\times 1$ , mos,  $\sim 50\%$ ).

279 The other classification of chromosomal errors was explored based on the  
280 coincidence of embryos’ and patients’ (the propositus) chromosomal/genomic  
281 abnormalities in PGT-SR. The results were grouped as “embryo’s chromosomal error  
282 coincident with female,” “embryo’s chromosomal error coincident with male,”  
283 “embryo’s chromosomal error inconsistent with female,” “embryo’s chromosomal  
284 error inconsistent with female,” “sole mosaic embryo,” and “chromosomal normal  
285 embryo.” Coincident errors mean the embryos’ chromosomes had complete or partial  
286 errors like female or male somatic chromosomes, i.e., 46, XX, t(1,16)(q42;q12) in  
287 somatic cells and 46, XN, +1q (q42.12 $\rightarrow$ qter,  $\sim 23.9$  M,  $\times 3$ ), -16q (q12.1 $\rightarrow$ q24.3,  $\sim 39$   
288 M,  $\times 1$ ) in the embryo.

289

290 Machine learning programming and statistical methods

291 PN machine learning, distinguishing female and male pronuclei, pronuclear  
292 labeling stability insurance, PN ranking order, and automatic mathematical model  
293 establishment were performed using Python 3.9.7 (downloaded from  
294 <https://www.python.org/>). Statistical analysis was performed using STATA12.0  
295 software (Statacorp, TX, USA). Continuous variables are expressed as mean with  
296 standard deviation (SD) and categorical data are expressed as rate. The heterogeneity  
297 test for continuous variables, the Chi-square test for trend comparison, Spearman  
298 correlation analysis, multiple regression, and multiple logistic regression for  
299 relationships were used as appropriate.

300

## 301 Results

302 After Mask R-CNN learning of 13419 handle-annotated 2PN images (276  
303 embryos from 83 couples), the number of frames for AI automatic recognition  
304 reached 16634 for this sample. After comparison with handle annotation using 16634

305 AI automatic recognized images, 3343 images were more mislabeling than the actual  
306 2PN images. In these 3343 images, 3192 images (95.48%) were came from  
307 early-stage PNs (12 hours post-insemination), the rest were came from 12-14 hours  
308 post-insemination and no images from 14 hours post-insemination. Additionally, 128  
309 images were missing because of partial overlap of two PNs in middle- or late-stage  
310 PNs (14–22 hours post-insemination) (Figure 3B).

311

312 The accuracy of distinguish PN numbers by Mask R-CNN learning for (0, 1, 2, 3)  
313 reached 80.06% ( $13419/(13419+3342+128)$ ) in recognition of all PN stages, 97.9%  
314 ( $13419/(13419+3342-3192+128)$ ) in recognition at 12 hours post-insemination to PN  
315 disappearance, and 99.06% ( $13419/(13419+128)$ ] at 14 hours to PN disappearance.  
316 No error was found in AI boundary drawing of PNs after handle checking except for  
317 PN number recognition-related boundary errors (e.g., mismarking vacuoles as PNs).  
318 For above errors in female and male pronucleus coefficient  $\beta_1$  calculation, original,  
319 adjusted (first and last three images deleted due to the high inaccuracy rate in  
320 recognition and high weight in the fitting curve model), 12 hours post-insemination,  
321 and 14 hours post-insemination values were extracted for effective testing. Then,  
322 2146 embryos from 184 patients who have top-quality blastocysts for PGT were  
323 included in the data analysis. Different grades of PN identification are shown in  
324 Figure 3C. In total, 529 from 2146 zygotes (24.65%) underwent handle male/female  
325 PN reversal after computer marking and embryologist checking.

Fig.3.The statement of PN developmental model and adjustment of coefficient

C.

(a.)

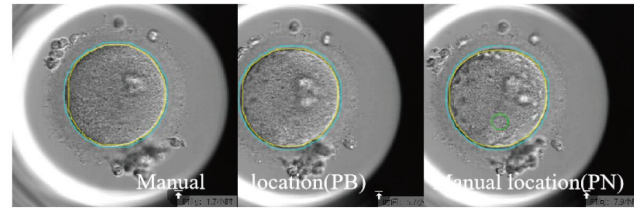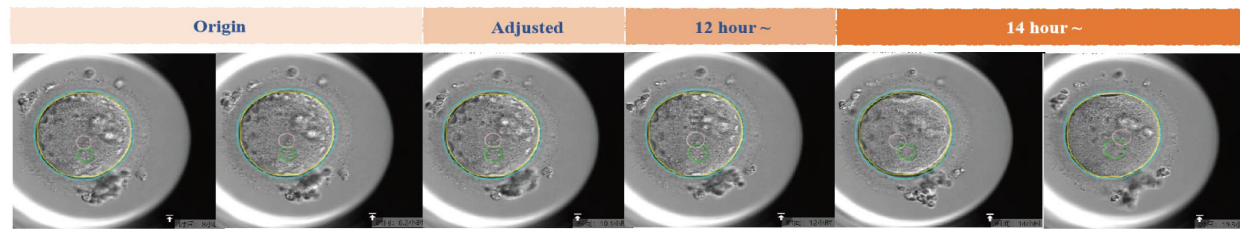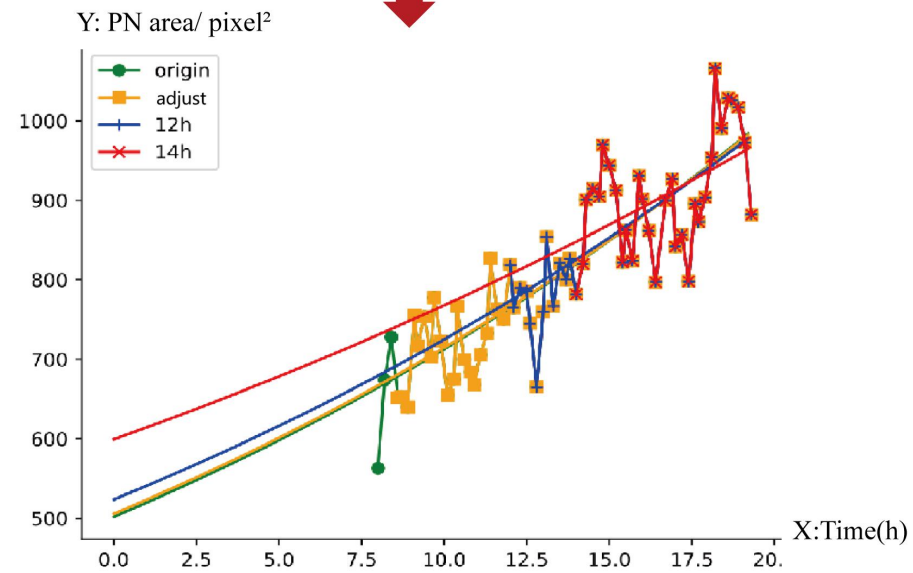

Fig.3.The statement of PN developmental model and adjustment of coefficient

C. (b.)

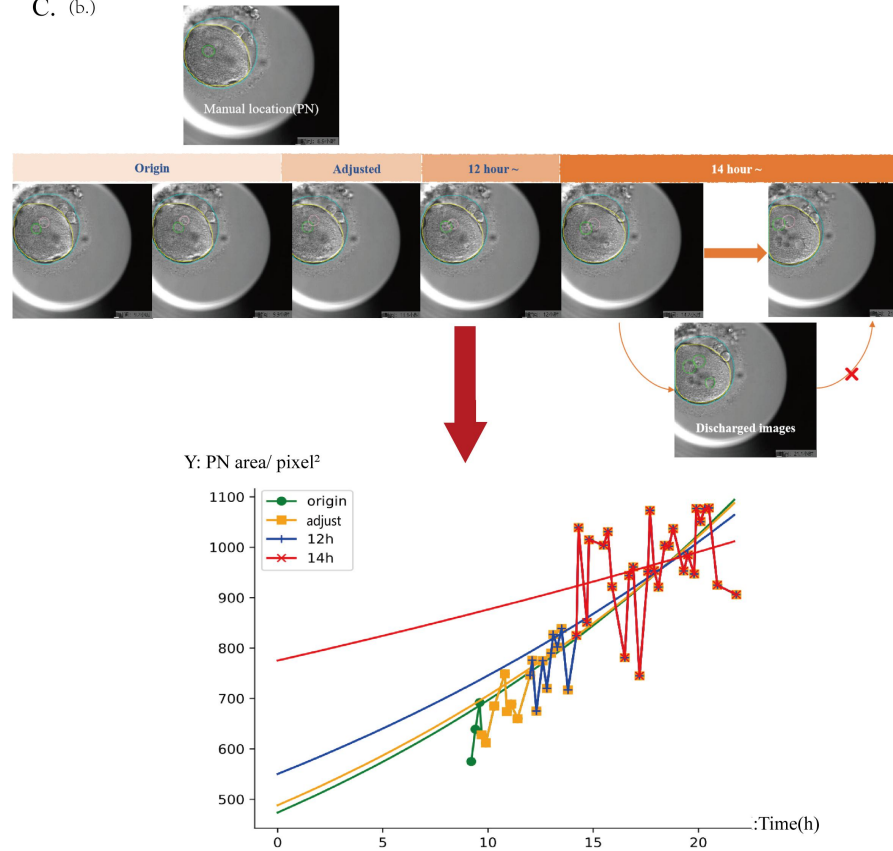

- a. All automatic recorded PN areas (the scatters in the figure) were included in the original fitting curve (green line). Normally the lowest value was the original coefficient  $\beta_1$ . The outlier PN areas of the first three frames (which have the highest variance) were deleted in the adjusted fitting curve (yellow line). Now, 12 hours post-insemination and 14 hours post-insemination fitting curves (blue and red lines) are depicted based on the lower automatic PN recognition error rates in those stages, which makes it easier to distinguish based on the value of  $\beta_1$ .
- b. Sometimes, errors in PN counting occurred in automatic PN recording, but all data with incorrect numbers of PNs (else than pink and green PN circles), such as 3PN (mislabeling a vacuole as PN), were omitted in fitting curves.

(C)Assessment of PN coefficients.



328 The baseline of patients and their IVF outcomes is shown in Table 1. Total frames  
329 of clear and distinguished 1655 2PN embryos reached 108587 images and these  
330 images were included to explore the factors that impacted female and male PN areas.  
331 In total, 1644 embryos with 108028 images were included for blastocyst formation  
332 analysis. Finally, 790 embryos with 52479 images from 155 patients were included  
333 for the analysis of both areas of pronuclei and PGT results.

334  
335

Table 1 Baseline characteristics of patients.

| Patient characteristics       | Mean (SD)        |
|-------------------------------|------------------|
| Age at IVF cycle              | 30.55 ± 3.94     |
| Retrieval oocyte              | 16.79 ± 6.81     |
| AMH level                     | 4.30 ± 2.77      |
| FSH (basic)                   | 5.59 ± 2.60      |
| BMI                           | 21.77 ± 2.76     |
| Gn day                        | 9.26 ± 1.56      |
| Gn dose                       | 1875.08 ± 622.27 |
| MII oocyte                    | 14.09 ± 6.20     |
| Infertility diagnosis (%)     |                  |
| Decreased ovarian reserve     | 2.22%            |
| Habitual loss                 | 9.63%            |
| Male chromosome abnormality   | 35.64%           |
| Female chromosome abnormality | 31.92%           |
| Uterine/fallopian tube factor | 8.00%            |
| Obstetric abnormality         | 5.31%            |
| Unexplained                   | 7.28%            |
| IVF protocol (%)              |                  |
| Gn-a                          | 43.1%            |
| Gn-ant                        | 56.9%            |

336  
337  
338  
339  
340  
341  
342  
343  
344  
345  
346  
347  
348  
349  
350

No clinical or cell biological factors were correlated with the female pronucleus coefficient  $\beta_1$  except for the male pronucleus coefficient  $\beta_1$  ( $r = 0.75$ ,  $P < 0.01$ , Table 2) and the distribution data of the pronuclear area showed significant heterogeneity in individual patients. This heterogeneity makes it impossible to find a normal range of coefficient  $\beta_1$  (original data:  $Q=96.32$ ,  $df=183$ ,  $I^2=95.6\%$ , Supplement Figure 1). For homogenized exploration of the correlation between pronucleus area coefficient  $\beta_1$  and PGT results, ranking orders (biggest to smallest, Supplement Figure 2) of tmale/female were employed for testing in every patient. In blastocyst formation analysis, 1064 zygotes successfully developed into blastocysts and 580 failed; no significant relationship was observed between ranking order of the female or male pronucleus coefficient  $\beta_1$  and blastocyst formation (Table 3).

351 Table 2. The correlation between the male and female pronuclear coefficient  $\beta_1$ .

| Dependent variable: female<br>pronuclear( coefficient $\beta_1$ ) | standard $\beta$ | <i>P</i> |
|-------------------------------------------------------------------|------------------|----------|
| male pronuclear                                                   | 0.75             | 0.000    |
| embryo                                                            | -0.06            | 0.064    |
| Gn day                                                            | -0.08            | 0.092    |
| Gn dose                                                           | 0.08             | 0.051    |
| MII oocytes number                                                | 0.04             | 0.232    |
| AMH                                                               | 0.02             | 0.409    |
| BMI                                                               | 0.07             | 0.200    |
| FSH (basic)                                                       | -0.01            | 0.755    |
| Female age                                                        | -0.04            | 0.095    |
| Infertility diagnosis                                             | -0.02            | 0.322    |
| IVF protocol                                                      | 0.02             | 0.496    |

352

353

354 Table 3 The chromosome-normal rate between blastocysts and embryos that failed to  
355 form blastocysts based on the rank of the pronucleus area coefficient  $\beta_1$ .

356

| Rank               | Female            |                | Male              |            |
|--------------------|-------------------|----------------|-------------------|------------|
|                    | formed blastocyst | failed         | formed blastocyst | failed     |
| 1                  | 126/211 (59.7%)   | 85/211 (40.3%) | 145(63.04%)       | 85(36.96%) |
| 2                  | 130/211 (61.6%)   | 81/211 (38.4%) | 117(63.59%)       | 67(36.41%) |
| 3                  | 125/199 (62.8%)   | 74/199 (37.2%) | 127(61.65%)       | 79(38.35%) |
| 4                  | 124/178 (69.7%)   | 54/178 (30.3%) | 128(63.05%)       | 75(36.95%) |
| 5                  | 108/167 (64.7%)   | 59/167 (35.3%) | 105(61.4%)        | 66(38.6%)  |
| 6                  | 95/137 (69.3%)    | 42/137 (30.7%) | 91(67.41%)        | 44(32.59%) |
| 7                  | 78/115 (67.8%)    | 37/115 (32.2%) | 76(71.03%)        | 31(28.97%) |
| 8                  | 52/92 (56.5%)     | 40/92 (43.5%)  | 63(71.59%)        | 25(28.41%) |
| 9                  | 55/75 (73.3%)     | 20/75 (26.7%)  | 54(72.97%)        | 20(27.03%) |
| 10                 | 41/59(69.5%)      | 18/59(30.5%)   | 52(73.24%)        | 19(26.76%) |
| >10                | 130/200 (65.0%)   | 70/200 (35.0%) | 106(60.57%)       | 69(39.43%) |
| Total              | 1064              | 580            | 1064              | 580        |
| Pearson Chi-Square | 12.94             |                | 7.18              |            |
| <i>P</i>           | 0.227             |                | 0.712             |            |

357

358

359 PGT results from transferable blastocysts have a U curve in the female  
360 age-dependent distribution (Supplement Figure 3). By the female PN original  
361 coefficient  $\beta_1$  ranking, chromosome normal rate (“chromosomal-normal” and “sole  
362 mosaic” proportion in total embryos) in the blastocyst with biggest PN area (top 1) is

363 much higher than that of the blastocyst with smallest PN (last 1) (58.06% vs. 45.16%,  
 364 OR = 1.68 [1.07–2.64];  $P = 0.031$ ), and the chromosome-normal rate of the top 2  
 365 blastocysts is higher than that of the last 2 blastocysts but with no statistical difference  
 366 (59.31% vs. 50.49%;  $P = 0.091$ ) (Supplemental Table 1-1). After adjusting for  
 367 coefficient  $\beta_1$ , the chromosome-normal rate in the top 1 blastocyst is much higher  
 368 than that of the last blastocyst (58.71% vs. 45.16%, OR = 1.73 [1.10–2.71];  $P =$   
 369 0.023), and the chromosome-normal rate of the top 2 blastocysts is higher than that of  
 370 the last 2 blastocysts but with no statistical difference (57.35% vs. 50.00%;  $P = 0.164$ )  
 371 (Supplemental Table 1-2). For coefficient  $\beta_1$  12 hours post-insemination, the  
 372 chromosome-normal rate in the top blastocyst is much higher than that of the last  
 373 blastocyst (64.52% vs. 43.23%, OR = 2.39 [1.51–3.77];  $P < 0.001$ ), and the  
 374 chromosome-normal rate in the top 2 blastocysts is higher than that of the last 2  
 375 blastocysts (63.73% vs. 47.55%, OR = 1.94 [1.30–2.88];  $P = 0.001$ ) (Supplemental  
 376 Table 1-3). For coefficient  $\beta_1$  14 hours post-insemination, the chromosome-normal  
 377 rate in the ranking top blastocyst is much higher than that of the last blastocyst  
 378 (66.45% vs. 42.58%, OR = 2.61 [1.68–4.24];  $P < 0.001$ ), and the chromosome-normal  
 379 rate in the top 2 blastocysts is higher than that of the last 2 blastocysts (64.22% vs.  
 380 48.04%, OR = 1.94 [1.31–2.89];  $P = 0.001$ ) (Supplemental Table 1-4). The trend that  
 381 the top blastocysts showed higher chromosome-normal rates can be observed in Table  
 382 4 and Figure 4A. However, for the male PN coefficient  $\beta_1$ , no significant difference  
 383 was observed (Figure 4B).

384

385 Table 4 The rate of chromosome-normal blastocysts by the female PN coefficient  $\beta_1$ .

386

| Rank | Origin          | Adjusted        | 12 h            | 14 h             |
|------|-----------------|-----------------|-----------------|------------------|
| 1    | 90/155 (58.06%) | 90/155 (58.06%) | 99/155 (63.87%) | 102/155 (65.81%) |
| 2    | 79/155 (50.97%) | 75/155 (48.38%) | 82/155 (52.9%)  | 79/155 (50.97%)  |
| 3    | 78/138 (56.52%) | 82/138 (59.42%) | 69/138 (50%)    | 70/138 (50.72%)  |
| 4    | 46/107 (42.99%) | 47/107 (43.93%) | 50/107 (46.73%) | 49/107 (45.79%)  |
| 5    | 40/81 (49.38%)  | 39/81 (48.15%)  | 37/81 (45.68%)  | 40/81 (49.38%)   |
| 6    | 33/56 (58.93%)  | 33/56 (58.93%)  | 31/56 (55.36%)  | 29/56 (51.79%)   |
| 7    | 23/37 (62.16%)  | 23/37 (62.16%)  | 17/37 (45.95%)  | 23/37 (62.16%)   |
| 8    | 13/25 (52%)     | 14/25 (56%)     | 17/25 (68%)     | 14/25 (56%)      |
| >8   | 16/36 (44.44%)  | 15/36 (41.67%)  | 16/36 (44.44%)  | 12/36 (33.33%)   |

387

Fig. 4. The rate of chromosome-normal blastocysts by the ranking of PN coefficient  $\beta_1$ .

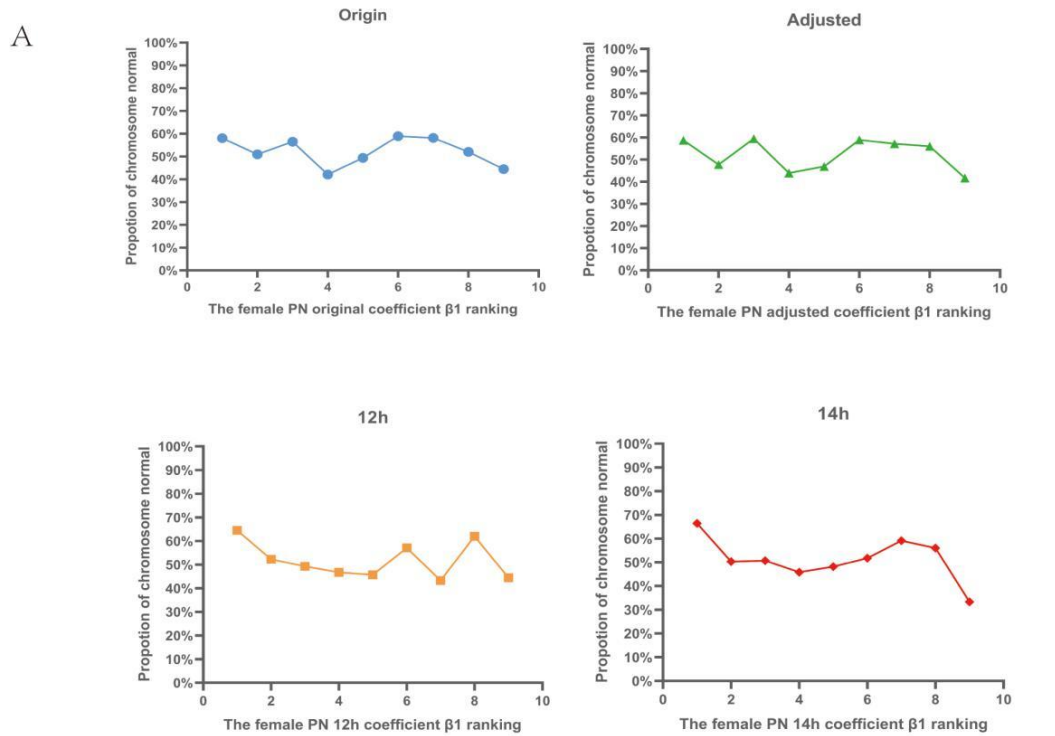

(A) The rate of chromosome-normal blastocysts by the ranking of female PN coefficient  $\beta_1$ .

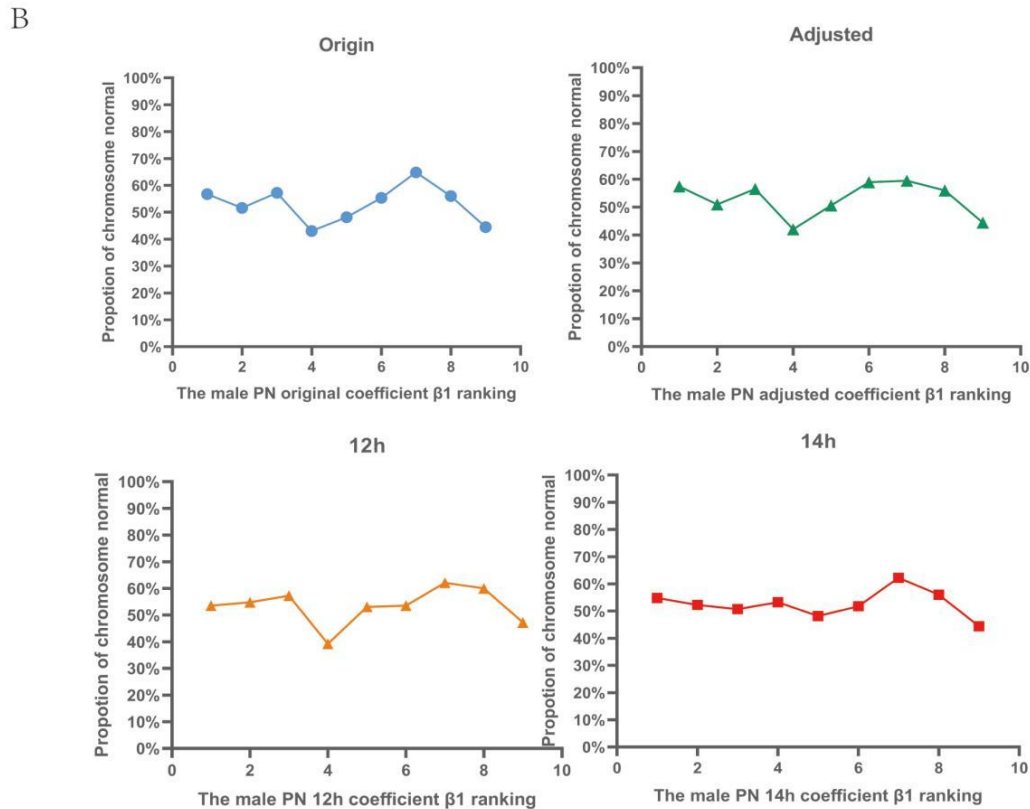

(B) The rate of chromosome-normal blastocysts by the ranking of male PN coefficient  $\beta_1$ .

389 In all patients without distinguishing PGT-A and PGT-SR, the first and last  
390 ranking order could be used to detect the chromosome-normal and sole mosaic  
391 embryos (46.45% vs. 28.39% in chromosome-normal rate, 66.45% vs. 42.58% in  
392 chromosome-normal plus mosaic rate) (Figure 5A, Supplemental Table 2). No  
393 significant differences of chromosomal status were obtained by coefficient  $\beta_1$  ranking  
394 in the PGT-A population (Figure 5B, Supplemental Table 4-5). However, in the  
395 PGT-SR population, the first order embryos in coefficient  $\beta_1$  ranking have higher  
396 chromosome-normal and sole mosaic rates than the last embryos (40.54% vs. 21.62%  
397 in chromosome-normal rate, 66.22% vs. 32.43% in chromosome-normal plus mosaic  
398 rate) (Figure 5C, Supplemental Table 6). Relatively smaller chromosomal errors  
399 defined as “euploid with errors” and “sole deletion and/or duplication” were  
400 significantly different between first-order and last-order embryos, even with  
401 median-order embryos having a hierarchical difference (PGT 9.68% vs. 15.41% vs.  
402 20%, PGT-SR 13.51% vs. 26.92% vs. 36.49%, respectively;  $P < 0.001$ ) (Figure 5A  
403 and C, Supplemental Table 3, 6 and 7). For population- and chromosomal  
404 error-stratified analysis of coefficient  $\beta_1$  at 14 hours post-insemination, PGT-A and  
405 PGT-SR, “aneuploidy with errors” and “euploidy with errors” (and a more detailed  
406 error classification including “chromosomal-normal,” “sole mosaic,” “sole  
407 aneuploidy,” and mosaic forms, “sole deletion and/or duplication” and mosaic forms,  
408 and “complex chromosomal errors”), “embryo’s chromosomal error  
409 coincident/inconsistent with female” and “embryo’s chromosomal error  
410 coincident/inconsistent with male” are shown in Figures 5B and 5C (Supplemental  
411 Table 4-9). From the female propositus and embryo analysis in PGT-SR, coefficient  
412  $\beta_1$  ranking has detection power in both coincident and inconsistent chromosomal  
413 errors (28.57% vs. 50%; 9.52% vs. 26.19%,  $P < 0.05$  respectively. Figure 5C,  
414 Supplemental Table 8), which implied inherited and novel errors in embryos, but no  
415 significant detection ability in male propositus and embryos (Figure 5C, Supplemental  
416 Table 9).

Fig.5. The correlation between PGT results and PNs coefficient  $\beta_1$  ranking

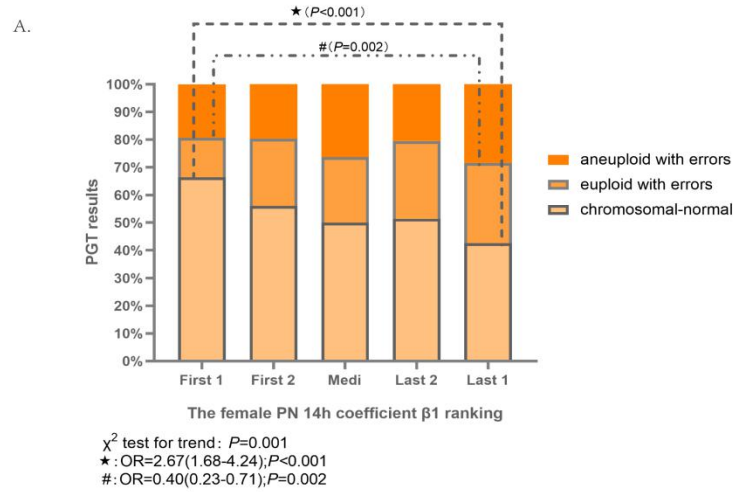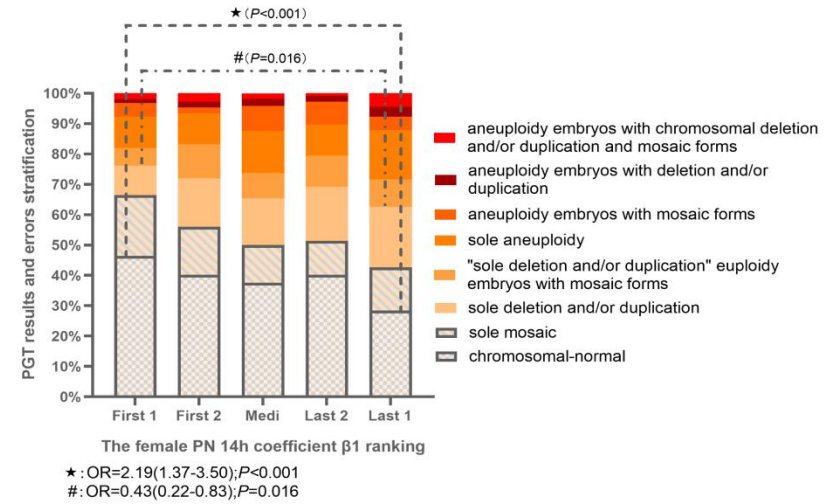

(A)PGT results.

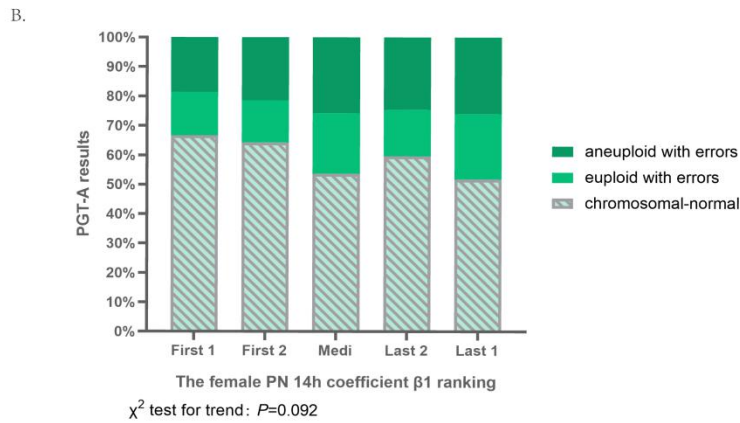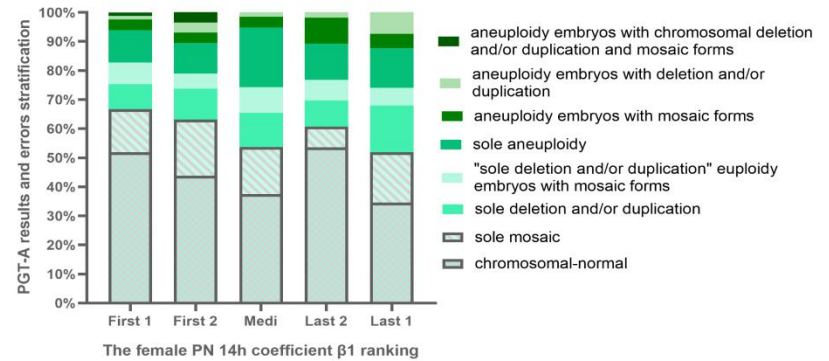

(B)PGT-A results.

Fig.5. The correlation between PGT results and PNs coefficient  $\beta_1$  ranking

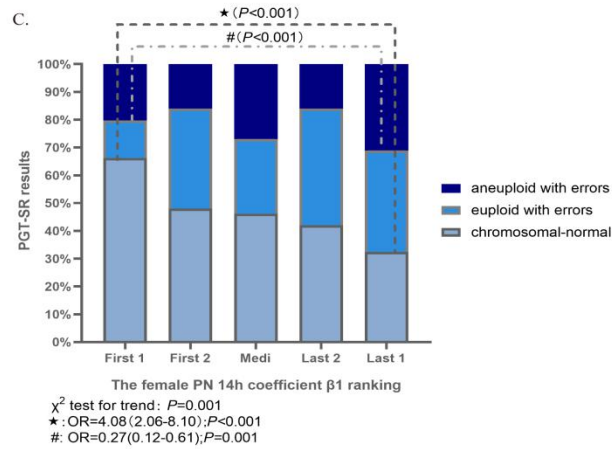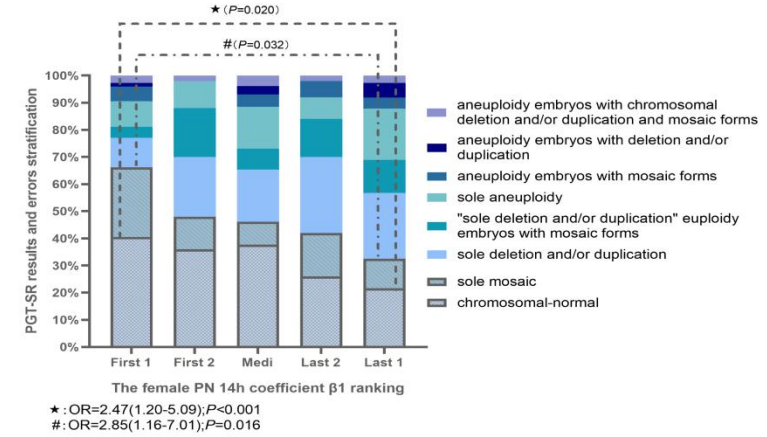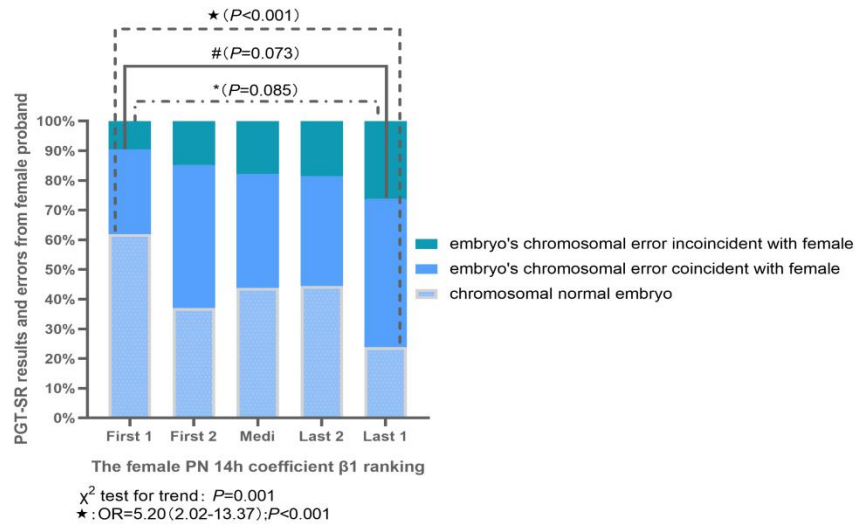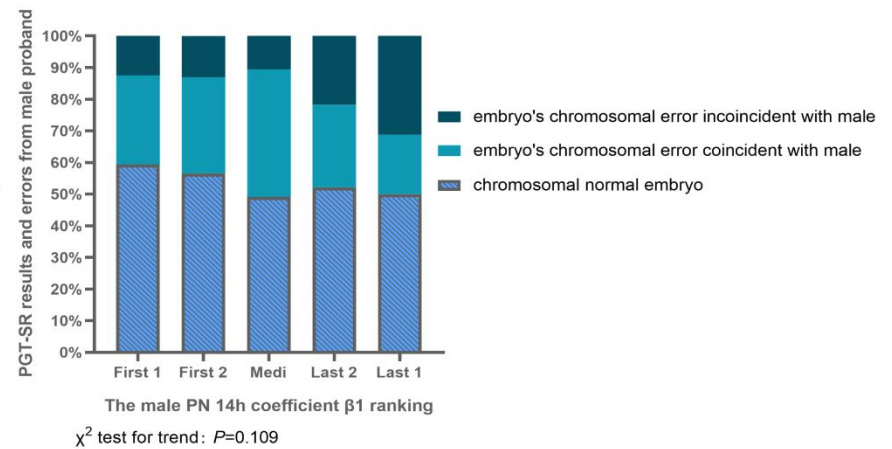

419 **Discussion**

420 An obvious relationship has been obtained between female PN and  
421 chromosome-normal rate in blastocyst-stage embryos for both original and adjusted  
422 analysis, but not for male PN. In the stratified analysis, female PN in the PGT-SR  
423 group, but no in the PGT-A group, have unambiguous detection power to distinguish  
424 relatively small chromosomal errors, such as “deletion and/or duplication” and mosaic  
425 forms. Inherited and novel errors in embryos could be found using female PN ranking  
426 in female diagnosis of the PGT-SR group. The overall positive pool effect of female  
427 PN diagnosis of chromosomal errors might be caused by the PGT-SR subgroup. The  
428 negative result in PGT-A might be because of a high false-positive rate (abnormal TE  
429 but normal ICM) as well as false-negative rate (normal TE but abnormal ICM) in this  
430 technique (Gleicher N et al., 2021).

431 From the PGT result, a high coincident U curve has been found as previously  
432 reported (Gruhn JR et al., 2019), but a small difference is that our age-distributed  
433 samples were blastocyst-stage embryos, not oocytes. Thus, chromosomal errors  
434 occurred post-PN from the cleavage to the morula and the blastocyst stage, and  
435 potential embryo self-correction in a later stage could reduce the power of PN  
436 predictors (Coticchio G et al., 2019;Grau N et al., 2011;Orvieto R et al., 2020).

437 The results indicated that embryonic chromosomal abnormality is more likely to  
438 be caused by eggs, especially in meiosis, and female PN developmental quantification  
439 could unveil the potential correlation (Miller MP et al., 2013;Warburton D et al.,  
440 1997;Mikwar M et al., 2020;Bolcun-Filas E et al., 2018;Webster A et al., 2017;Cairo  
441 G et al., 2020;Capalbo A et al., 2017). Again, the results confirmed the theory that the  
442 pronuclear stage could be the only road that mirrors the internal oocyte quality and  
443 chromosomal integrity. However, due to the low chromosomal error rate in sperm,  
444 male PNs had no predictive value (Bell AD et al., 2020). Here, we excluded  
445 chromosomal mosaicism because the typical mitotic errors could not be associated  
446 with PN stage, but the effects of mitotic errors will merge in cleavage- and  
447 blastocyst-stage embryos (Zhang X et al., 2021). In the earliest design of outcome  
448 measurements, the total chromosomal substance was classified as normal, deletion,  
449 and duplication, but no significant difference was obtained (Supplemental Table 10).  
450 Interestingly, when the outcome measure was changed into normal and abnormal, a  
451 clear difference was observed. The exact reason will be studied in further research.

452 A higher correlation has been obtained between female and male PN coefficient  
453  $\beta_1$ , but no clinical or cell biological factor exhibited a similar correlation in  
454 subsequent analyses. The high heterogeneity of the PN coefficient  $\beta_1$  made it  
455 impossible to establish a normal and abnormal range in clinical practice. No  
456 relationship between female or male PN and blastocyst formation has been found,  
457 revealing that protein and energy storage could be more important to the  
458 developmental viability of embryos than chromosomal normality, at least if  
459 chromosomal errors are not too big (Coticchio G et al., 2021).

460 This study was the first report on automatic calculation in morphologic  
461 quantitative data extraction by expert experience deep learning in human embryos.



462 The results of the PN coefficient  $\beta_1$  suggest that detailed analysis of the images of  
463 developing embryos could improve our understanding of developmental biology, but  
464 more features of annotated embryos increase the errors in first and second polar body  
465 recognition (Cavazza T et al., 2021; Manor D et al., 1999; Otsuki J et al., 2017; Borges  
466 EJ et al., 2005). Further high-quality design studies are needed to improve the  
467 availability of quantitative PN assessment in clinical practice.

#### 468 **Ideas and Speculation**

469 Previously studies have reported dark box algorithm employed for embryo  
470 assessment compared with handle in this paper, but it could not explain how AI  
471 renders a decision from the embryos' images. Embryo assessment from another  
472 access: embryo features deep learning and transfer those features into quantitative  
473 parameters for subsequent algorithm established and analyzed could more  
474 comprehensible for developmental biology and genetics. Then the PN morphology  
475 could mirror the internal quality of the chromosomal integrity of the oocyte and the  
476 spermatozoon.

477 **Reference**

478 Alpha Scientists in Reproductive M, Embryology ESIGo. The Istanbul  
479 consensus workshop on embryo assessment: proceedings of an expert meeting.  
480 Human reproduction. 2011;26(6):1270-83.

481 Aydin S, Cinar O, Demir B, Korkmaz C, Ozdegirmenci O, Dilbaz S, et al. Is  
482 pronuclear scoring a really good predictor for ICSI cycles? Gynecological  
483 endocrinology : the official journal of the International Society of Gynecological  
484 Endocrinology. 2011;27(10):742-7.

485 Balaban B, Urman B, Isiklar A, Alatas C, Aksoy S, Mercan R, et al. The effect of  
486 pronuclear morphology on embryo quality parameters and blastocyst transfer outcome.  
487 Human reproduction (Oxford, England). 2001;16(11):2357-61.

488 Bar-Yoseph H, Levy A, Sonin Y, Alboteanu S, Levitas E, Lunenfeld E, et al.  
489 Morphological embryo assessment: reevaluation. Fertility and sterility.  
490 2011;95(5):1624-8 e1-2.

491 Belkin, M. , and P. Niyogi . "Towards a Theoretical Foundation for  
492 Laplacian-Based Manifold Methods." International Conference on Computational  
493 Learning Theory Springer, Berlin, Heidelberg, 2005.

494 Bell AD, Mello CJ, Nemesh J, Brumbaugh SA, Wysoker A, McCarroll SA.  
495 Insights into variation in meiosis from 31,228 human sperm genomes. Nature.  
496 2020;583(7815):259-64.

497 Bolcun-Filas E, Handel MA. Meiosis: the chromosomal foundation of  
498 reproduction. Biology of reproduction. 2018;99(1):112-26.

499 Borges EJ, Rossi LM, Farah L, Guilherme P, Rocha CC, Ortiz V, Iaconelli AJ.  
500 The impact of pronuclear orientation to select chromosomally normal embryos. J  
501 Assist Reprod Genet. 2005; 22(3):107-14. doi: 10.1007/s10815-005-4874-x.PMID:  
502 16018240; PMCID: PMC3455178.

503 Cai D, He X, Han J, Zhang H-J. Orthogonal laplacianfaces for face recognition.  
504 IEEE Trans Image Process. 2006;15(11):3608-14.

505 Cairo G, Lacefield S. Establishing correct kinetochore-microtubule attachments  
506 in mitosis and meiosis. Essays Biochem. 2020 Sep 4;64(2):277-287.

507 Capalbo A, Hoffmann ER, Cimadomo D, Ubaldi FM, Rienzi L. Human female  
508 meiosis revised: new insights into the mechanisms of chromosome segregation and  
509 aneuploidies from advanced genomics and time-lapse imaging. Human reproduction  
510 update. 2017;23(6):706-22.

511 Cavazza T, Takeda Y, Politi AZ, Aushev M, Aldag P, Baker C, Choudhary  
512 M,Bucevičius J, Lukinavičius G, Elder K, Blayney M, Lucas-Hahn A, Niemann  
513 H,Herbert M, Schuh M. Parental genome unification is highly error-prone in  
514 mammalian embryos. Cell. 2021; 184(11):2860-2877.e22.  
515 doi:10.1016/j.cell.2021.04.013.

516 Chavez SL, Loewke KE, Han J, Moussavi F, Colls P, Munne S, et al. Dynamic  
517 blastomere behaviour reflects human embryo ploidy by the four-cell stage. Nature  
518 communications. 2012;3:1251.

519 Coticchio G, Fiorentino G, Nicora G, Sciajno R, Cavalera F, Bellazzi R, et al.

520 Cytoplasmic movements of the early human embryo: imaging and artificial  
521 intelligence to predict blastocyst development. *Reproductive biomedicine online*.  
522 2021;42(3):521-8.

523 Cotichio G, Lagalla C, Sturmey R, Pennetta F, Borini A. The enigmatic morula:  
524 mechanisms of development, cell fate determination, self-correction and implications  
525 for ART. *Human reproduction update*. 2019;25(4):422-38.

526 Cotichio G, Mignini Renzini M, Novara PV, Lain M, De Ponti E, Turchi D, et al.  
527 Focused time-lapse analysis reveals novel aspects of human fertilization and suggests  
528 new parameters of embryo viability. *Human reproduction*. 2018;33(1):23-31.

529 Daughtry BL, Rosenkrantz JL, Lazar NH, Fei SS, Redmayne N, Torkenczy KA, et  
530 al. Single-cell sequencing of primate preimplantation embryos reveals chromosome  
531 elimination via cellular fragmentation and blastomere exclusion. *Genome Res*.  
532 2019;29(3):367-82.

533 Doody KJ. The time has come to reevaluate the fertilization check. *Fertility and*  
534 *sterility*. 2021;115(1):74-5.

535 Gámiz P, Rubio C, de los Santos MJ, Mercader A, Simón C, Remohí J, et al. The  
536 effect of pronuclear morphology on early development and chromosomal  
537 abnormalities in cleavage-stage embryos. *Human reproduction (Oxford, England)*.  
538 2003;18(11):2413-9.

539 Gianaroli L, Magli MC, Ferraretti AP, Lappi M, Borghi E, Ermini B. Oocyte  
540 euploidy, pronuclear zygote morphology and embryo chromosomal complement.  
541 *Human reproduction*. 2007;22(1):241-9.

542 Gleicher N, Patrizio P, Brivanlou A. Preimplantation Genetic Testing for  
543 Aneuploidy - a Castle Built on Sand. *Trends in molecular medicine*.  
544 2021;27(8):731-42.

545 Grau N, Escrich L, Martin J, Rubio C, Pellicer A, Escriba MJ. Self-correction in  
546 tripronucleated human embryos. *Fertility and sterility*. 2011;96(4):951-6.

547 Gruhn JR, Zielinska AP, Shukla V, Blanshard R, Capalbo A, Cimadomo D, et al.  
548 Chromosome errors in human eggs shape natural fertility over reproductive life span.  
549 *Science*. 2019;365(6460):1466-9.

550 He K, Gkioxari G, Dollar P, Girshick R. Mask R-CNN. *IEEE Trans Pattern Anal*  
551 *Mach Intell*. 2020 Feb;42(2):386-397. doi: 0.1109/TPAMI.2018.2844175.

552 Hoffman R, Gross L. Modulation contrast microscope. *Appl Opt*.  
553 1975;14(5):1169-76.

554 Jaroudi K, Al-Hassan S, Sieck U, Al-Sufyan H, Al-Kabra M, Coskun S. Zygote  
555 transfer on day 1 versus cleavage stage embryo transfer on day 3: a prospective  
556 randomized trial. *Human reproduction (Oxford, England)*. 2004;19(3):645-8.

557 Kuliev A, Zlatopolsky Z, Kirillova I, Spivakova J, Cieslak Janzen J. Meiosis  
558 errors in over 20,000 oocytes studied in the practice of preimplantation aneuploidy  
559 testing. *Reproductive biomedicine online*. 2011;22(1):2-8.

560 Lamb NE, Freeman SB, Savage-Austin A, Pettay D, Taft L, Hersey J, et al.  
561 Susceptible chiasmate configurations of chromosome 21 predispose to  
562 non-disjunction in both maternal meiosis I and meiosis II. *Nat Genet*.

563 1996;14(4):400-5.

564 Li M, Huang J, Zhuang X, Lin S, Dang Y, Wang Y, et al. Obstetric and neonatal  
565 outcomes after the transfer of vitrified-warmed blastocysts developing from  
566 nonpronuclear and monopronuclear zygotes: a retrospective cohort study. *Fertility and*  
567 *sterility*. 2021;115(1):110-7.

568 Manor D, Drugan A, Stein D, Pillar M, Itskovitz-Eldor J. Unequal pronuclear  
569 size--a powerful predictor of embryonic chromosome anomalies. *J Assist Reprod*  
570 *Genet*. 1999;16(7):385-9. doi: 10.1023/a:1020550115345. PMID: 10459523;PMCID:  
571 PMC3455778.

572 Mikwar M, MacFarlane AJ, Marchetti F. Mechanisms of oocyte aneuploidy  
573 associated with advanced maternal age. *Mutation research Reviews in mutation*  
574 *research*. 2020;785:108320.

575 Miller MP, Amon A, Unal E. Meiosis I: when chromosomes undergo extreme  
576 makeover. *Current opinion in cell biology*. 2013;25(6):687-96.

577 Munné S. Chromosome abnormalities and their relationship to morphology and  
578 development of human embryos. *Reproductive biomedicine online*.  
579 2006;12(2):234-53.

580 Nicoli A, Palomba S, Capodanno F, Fini M, Falbo A, La Sala GB. Pronuclear  
581 morphology evaluation for fresh in vitro fertilization (IVF) and intracytoplasmic  
582 sperm injection (ICSI) cycles: a systematic review. *J Ovarian Res*. 2013;6(1):64.

583 Orvieto R, Shimon C, Rienstein S, Jonish-Grossman A, Shani H, Aizer A. Do  
584 human embryos have the ability of self-correction? *Reproductive biology and*  
585 *endocrinology : RB&E*. 2020;18(1):98.

586 Otsuki J, Iwasaki T, Tsuji Y, Katada Y, Sato H, Tsutsumi Y, Hatano K, Furuhashi  
587 K, Matsumoto Y, Kokeguchi S, Shiotani M. Potential of zygotes to produce live births  
588 can be identified by the size of the male and female pronuclei just before their  
589 membranes break down. *Reprod Med Biol*. 2017 ;16(2):200-205. doi:  
590 10.1002/rmb2.12032. PMID: 29259470; PMCID: PMC5661814

591 Rienzi L, Ubaldi F, Iacobelli M, Ferrero S, Minasi MG, Martinez F, et al. Day 3  
592 embryo transfer with combined evaluation at the pronuclear and cleavage stages  
593 compares favourably with day 5 blastocyst transfer. *Human reproduction (Oxford,*  
594 *England)*. 2002;17(7):1852-5.

595 Roos Kulmann MI, Lumertz Martello C, Bos-Mikich A, Frantz N. Pronuclear and  
596 blastocyst morphology are associated age-dependently with embryo ploidy in in vitro  
597 fertilization cycles. *Human fertility*. 2020:1-8.

598 Scheffler K, Uraji J, Jentoft I, Cavazza T, Monnich E, Mogessie B, et al. Two  
599 mechanisms drive pronuclear migration in mouse zygotes. *Nature communications*.  
600 2021;12(1):841.

601 Scott LA, Smith S. The successful use of pronuclear embryo transfers the day  
602 following oocyte retrieval. *Human reproduction (Oxford, England)*.  
603 1998;13(4):1003-13.

604 Tesarik J, Junca AM, Hazout A, Aubriot FX, Nathan C, Cohen-Bacrie P, et al.  
605 Embryos with high implantation potential after intracytoplasmic sperm injection can

606 be recognized by a simple, non-invasive examination of pronuclear morphology.  
607 Human reproduction (Oxford, England). 2000;15(6):1396-9.

608 Warburton D. Human female meiosis: new insights into an error-prone process.  
609 Am J Hum Genet. 1997;61(1):1-4.

610 Webster A, Schuh M. Mechanisms of Aneuploidy in Human Eggs. Trends in cell  
611 biology. 2017;27(1):55-68.

612 Wiker S, Malter H, Wright G, Cohen J. Recognition of paternal pronuclei in  
613 human zygotes. J In Vitro Fert Embryo Transf. 1990;7(1):33-7.

614 Wright G, Wiker S, Elsner C, Kort H, Massey J, Mitchell D, et al. Observations  
615 on the morphology of pronuclei and nucleoli in human zygotes and implications for  
616 cryopreservation. Human reproduction (Oxford, England). 1990;5(1):109-15.

617 Yang D, Feng D, Gao Y, Sagnelli M, Wang X, Li D. An effective method for  
618 trophoctoderm biopsy using mechanical blunt dissection: a step-by-step  
619 demonstration. Fertility and sterility. 2020;114(2):438-9.

620 Zhang X, Yang J, Han W, Li C, Huang G. Blastomere movement correlates with  
621 ploidy and mosaicism in early-stage human embryos after in vitro fertilization.  
622 Zygote. 2021:1-15.

623 Zhao M, Xu M, Li H, Alqawasmeh O, Chung JPW, Li TC, et al. Application of  
624 convolutional neural network on early human embryo segmentation during in vitro  
625 fertilization. Journal of cellular and molecular medicine. 2021;25(5):2633-44.

626 Zollner U, Zollner KP, Hartl G, Dietl J, Steck T. The use of a detailed zygote  
627 score after IVF/ICSI to obtain good quality blastocysts: the German experience.  
628 Human reproduction (Oxford, England). 2002;17(5):1327-33.

629

630

631

632

633

634

635

636

637

638

639

640

641
