# Supplementary material for: Variation of female pronucleus reveal oocyte or embryo abnormality: An expert experience deep learning of non-dark box analysis
Source: bioRxiv or medRxiv preprint supplement (doi:10.1101/2021.12.17.473071), 2021-12-17

## Supplement

Table 1-1. Finding a chromosome-normal blastocyst by the original ranking of embryos.

| Number of embryo | N   | First           | Median 1        | Last            | First 1 & 2      | Median 2        | Last 1 & 2       |
|------------------|-----|-----------------|-----------------|-----------------|------------------|-----------------|------------------|
| 2                | 34  | 11/17 (64.71)   | /               | 7/17 (41.18)    | /                | /               | /                |
| 3                | 93  | 16/31 (51.61)   | 14/31 (45.16)   | 18/31 (58.06)   | /                | /               | /                |
| 4                | 104 | 11/26 (42.31)   | 26/52 (50.00)   | 10/26 (38.46)   | 21/52 (40.38)    | /               | 26/52 (50.00)    |
| 5                | 125 | 12/25 (48.00)   | 36/75 (48.00)   | 10/25 (40.00)   | 25/50 (50.00)    | 13/25 (52.00)   | 20/50 (40.00)    |
| 6                | 114 | 15/19 (78.95)   | 42/76 (55.26)   | 7/19 (36.84)    | 28/38 (73.68)    | 19/38 (50.00)   | 17/38 (44.74)    |
| 7                | 84  | 11/12 (91.67)   | 39/60 (65.00)   | 8/12 (66.67)    | 21/24 (87.50)    | 20/36 (55.56)   | 17/24 (70.83)    |
| 8                | 96  | 8/12 (66.67)    | 40/72 (55.56)   | 6/12 (50.00)    | 14/24 (58.33)    | 27/48 (56.25)   | 13/24 (54.17)    |
| 9                | 9   | 0/1 (0)         | 3/7 (42.86)     | 0/1 (0)         | 1/2 (50.00)      | 2/5 (40.00)     | 0/2 (0)          |
| 10               | 60  | 3/6 (50.00)     | 32/48 (66.67)   | 3/6 (50.00)     | 6/12 (50.00)     | 25/36 (69.44)   | 7/12 (58.33)     |
| 11               | 22  | 1/2 (50.00)     | 8/18 (33.33)    | 1/2 (50.00)     | 2/4 (50.00)      | 6/14 (42.86)    | 2/4 (50.00)      |
| 12               | 36  | 2/3 (66.67)     | 10/30 (33.33)   | 0/3 (0)         | 3/6 (50.00)      | 8/24 (33.33)    | 1/6 (16.67)      |
| 13               | 13  | 0/1 (0.00)      | 7/11 (63.64)    | 0/1 (0)         | 0/2 (0.00)       | 7/9 (77.78)     | 0/2 (0)          |
| Total            | 790 | 90/155 (58.06)* | 227/480 (47.29) | 70/155 (45.16)* | 121/204 (59.31)# | 127/235 (54.04) | 103/204 (50.49)# |

\*58.06% vs. 45.16%, OR = 1.68 (1.07–2.64);  $P = 0.031$

#59.31% vs. 50.49%, OR = 1.43 (0.97–2.14);  $P = 0.091$

Table 1-2. Finding a chromosome-normal blastocyst by the adjusted ranking of embryos.

| Number of embryo | N   | First           | Median 1        | Last            | First 2          | Median 2        | Last 2           |
|------------------|-----|-----------------|-----------------|-----------------|------------------|-----------------|------------------|
| 2                | 34  | 10/17 (58.82)   |                 | 8/17 (47.06)    | /                | /               | /                |
| 3                | 93  | 17/31 (54.84)   | 13/31 (41.94)   | 18/31 (58.06)   | /                | /               | /                |
| 4                | 104 | 12/26 (46.15)   | 27/52 (51.92)   | 8/26 (30.77)    | 21/52 (40.38)    | /               | 26/52 (50.00)    |
| 5                | 125 | 13/25 (52.00)   | 35/75 (46.67)   | 10/25 (40.00)   | 25/50 (50.00)    | 14/25 (56.00)   | 19/50 (38.00)    |
| 6                | 114 | 14/19 (73.68)   | 42/76 (55.26)   | 8/19 (42.11)    | 26/38 (68.42)    | 21/38 (55.26)   | 17/38 (44.74)    |
| 7                | 84  | 11/12 (91.67)   | 39/60 (65.00)   | 8/12 (66.67)    | 20/24 (83.33)    | 21/36 (58.33)   | 17/24 (70.83)    |
| 8                | 96  | 8/12 (66.67)    | 40/72 (55.56)   | 6/12 (50.00)    | 15/24 (62.50)    | 26/48 (54.17)   | 13/24 (54.17)    |
| 9                | 9   | 0/1 (0)         | 3/7 (42.86)     | 0/1 (0)         | 0/2 (0)          | 3/5 (60.00)     | 0/2 (0)          |
| 10               | 60  | 3/6 (50.00)     | 32/48 (66.67)   | 3/6 (50.00)     | 6/12 (50.00)     | 25/36 (69.44)   | 7/12 (58.33)     |
| 11               | 22  | 1/2 (50.00)     | 8/18 (44.44)    | 1/2 (50.00)     | 1/4 (25.00)      | 7/14 (50.00)    | 2/4 (50.00)      |
| 12               | 36  | 2/3 (66.67)     | 10/30 (33.33)   | 0/3 (0)         | 3/6 (50.00)      | 8/24 (33.33)    | 1/6 (16.67)      |
| 13               | 13  | 0/1 (0)         | 7/11 (63.64)    | 0/1 (0)         | 0/2 (0)          | 7/9 (77.78)     | 0/2 (0)          |
| Total            | 790 | 91/155 (58.71)* | 246/480 (51.25) | 70/155 (45.16)* | 117/204 (57.35)# | 132/235 (56.17) | 102/204 (50.00)# |

\*58.71% vs. 45.16%, OR = 1.73 (1.10–2.71);  $P = 0.023$

#57.35% vs. 50.00%, OR = 1.35 (0.91–1.99);  $P = 0.164$

Table 1-3. Finding a chromosome-normal blastocyst by the ranking of 12 h embryos.

| Number of embryo | N   | First            | Median 1        | Last            | First 2          | Median 2        | Last 2          |
|------------------|-----|------------------|-----------------|-----------------|------------------|-----------------|-----------------|
| 2                | 34  | 11/17 (64.71)    |                 | 7/17 (41.18)    | /                | /               | /               |
| 3                | 93  | 19/31 (61.29)    | 14/31 (45.16)   | 15/31 (48.39)   | /                | /               | /               |
| 4                | 104 | 13/26 (50.00)    | 26/52 (50.00)   | 8/26 (30.77)    | 26/52 (50.00)    | /               | 21/52 (40.38)   |
| 5                | 125 | 15/25 (60.00)    | 34/75 (45.33)   | 9/25 (36.00)    | 27/50 (54.00)    | 12/25 (48.00)   | 19/50 (38.00)   |
| 6                | 114 | 14/19 (73.68)    | 42/76 (55.26)   | 8/19 (42.11)    | 25/38 (65.79)    | 20/38 (52.63)   | 19/38 (50.00)   |
| 7                | 84  | 12/12 (100.00)   | 39/60 (65.00)   | 7/12 (58.33)    | 22/24 (91.67)    | 20/36 (55.56)   | 16/24 (66.67)   |
| 8                | 96  | 9/12 (75.00)     | 35/72 (48.61)   | 10/12 (83.33)   | 14/24 (58.33)    | 27/48 (56.25)   | 13/24 (54.17)   |
| 9                | 9   | 1/1 (100.00)     | 2/7 (28.57)     | 0/1 (0)         | 1/2 (50.00)      | 2/5 (40.00)     | 0/2 (0)         |
| 10               | 60  | 4/6 (66.67)      | 32/48 (66.67)   | 2/6 (33.33)     | 10/12 (83.33)    | 22/36 (61.11)   | 6/12 (50.00)    |
| 11               | 22  | 0/2 (0)          | 9/18 (50.00)    | 1/2 (50.00)     | 2/4 (50.00)      | 5/14 (35.71)    | 3/4 (75.00)     |
| 12               | 36  | 2/3 (66.67)      | 10/30 (33.33)   | 0/3 (0)         | 3/6 (50.00)      | 9/24 (37.50)    | 0/6 (0)         |
| 13               | 13  | 0/1 (0)          | 7/11 (63.64)    | 0/1 (0)         | 0/2 (0)          | 7/9 (77.78)     | 0/2 (0)         |
| Total            | 790 | 100/155 (64.52)* | 250/480 (52.08) | 67/155 (43.23)* | 130/204 (63.73)# | 124/235 (52.77) | 97/204 (47.55)# |

\*64.52% vs. 43.23%, OR = 2.39 (1.51–3.77);  $P < 0.001$

#63.73% vs. 47.55%, OR = 1.94 (1.30–2.88);  $P = 0.001$

Table 1-4. Finding a chromosome-normal blastocyst by the ranking of 14 h embryos.

| Number of embryo | N   | First            | Median 1        | Last            | First 2          | Median 2        | Last 2          |
|------------------|-----|------------------|-----------------|-----------------|------------------|-----------------|-----------------|
| 2                | 34  | 11/17 (64.71)    |                 | 7/17 (41.18)    | /                | /               | /               |
| 3                | 93  | 21/31 (67.74)    | 11/31 (35.48)   | 16/31 (51.61)   | /                | /               | /               |
| 4                | 104 | 13/26 (50.00)    | 25/52 (48.08)   | 9/26 (34.62)    | 26/52 (50.00)    | /               | 21/52 (40.38)   |
| 5                | 125 | 13/25 (52.00)    | 36/75 (48.00)   | 9/25 (36.00)    | 26/50 (52.00)    | 11/25 (44.00)   | 21/50 (42.00)   |
| 6                | 114 | 17/19 (89.47)    | 39/76 (51.32)   | 8/19 (42.11)    | 28/38 (73.68)    | 17/38 (44.74)   | 19/38 (50.00)   |
| 7                | 84  | 11/12 (91.67)    | 40/60 (66.67)   | 7/12 (58.33)    | 21/24 (87.50)    | 23/36 (63.89)   | 14/24 (58.33)   |
| 8                | 96  | 9/12 (75.00)     | 38/72 (52.78)   | 7/12 (58.33)    | 14/24 (58.33)    | 26/48 (54.17)   | 14/24 (58.33)   |
| 9                | 9   | 1/1 (100.00)     | 2/7 (28.57)     | 0/1 (0)         | 1/2 (50.00)      | 2/5 (40.00)     | 0/2 (0)         |
| 10               | 60  | 5/6 (83.33)      | 31/48 (64.58)   | 2/6 (33.33)     | 9/12 (75.00)     | 24/36 (66.67)   | 5/12 (41.67)    |
| 11               | 22  | 0/2 (0)          | 9/18 (50.00)    | 1/2 (50.00)     | 2/4 (50.00)      | 6/14 (42.86)    | 2/4 (50.00)     |
| 12               | 36  | 2/3 (66.67)      | 10/30 (33.33)   | 0/3 (0)         | 3/6 (50.00)      | 8/24 (33.33)    | 1/6 (16.67)     |
| 13               | 13  | 0/1 (0)          | 7/11 (63.64)    | 0/1 (0)         | 1/2 (50.00)      | 5/9 (55.56)     | 1/2 (50.00)     |
| Total            | 790 | 103/155 (66.45)* | 248/480 (51.67) | 66/155 (42.58)* | 131/204 (64.22)# | 122/235 (51.91) | 98/204 (48.04)# |

\*66.45% vs. 42.58%, OR = 2.61 (1.68–4.24);  $P < 0.001$

#64.22% vs. 48.04%, OR = 1.94 (1.31–2.89);  $P = 0.001$

Table 2. PGT results and female PN 14 h coefficient  $\beta_1$  ranking.

| PGT result                    | First 1           | First 2         | Median          | Last 2          | Last 1           |
|-------------------------------|-------------------|-----------------|-----------------|-----------------|------------------|
| Chromosomal-normal and mosaic | 103/155 (66.45%)* | 60/107 (56.07%) | 133/266 (50%)   | 55/107 (51.4%)  | 66/155 (42.58%)* |
| Euploid with errors           | 22/155 (14.19%)#  | 26/107 (24.3%)  | 63/266 (23.68%) | 30/107 (28.04%) | 45/155 (29.03%)# |
| Aneuploid with errors         | 30/155 (19.35%)   | 21/107 (19.63%) | 70/266 (26.32%) | 22/107 (20.56%) | 44/155 (28.39%)  |

\*66.45% vs. 42.58%, OR = 2.67 (1.68 - 4.24),  $P < 0.001$ ;

#14.19% vs. 29.03%, OR = 0.40 (0.23 - 0.71),  $P = 0.002$

Table 3. PGT results (errors stratification) and female PN 14 h coefficient  $\beta_1$  ranking.

| PGT result                                                                       | First 1          | First 2         | Median           | Last 2          | Last 1           |
|----------------------------------------------------------------------------------|------------------|-----------------|------------------|-----------------|------------------|
| Chromosome-normal                                                                | 72/155 (46.45%)* | 43/107 (40.19%) | 100/266 (37.59%) | 43/107 (40.19%) | 44/155 (28.39%)* |
| Sole mosaic                                                                      | 31/155 (20.00%)  | 17/107 (15.89%) | 33/266 (12.41%)  | 12/107 (11.21%) | 22/155 (14.19%)  |
| Sole deletion and/or duplication                                                 | 15/155 (9.68%)#  | 17/107 (15.89%) | 41/266 (15.41%)  | 19/107 (17.76%) | 31/155 (20.00%)# |
| Sole deletion and/or duplication euploidy embryos with mosaic forms              | 9/155 (5.81%)    | 12/107 (11.21%) | 22/266 (8.27%)   | 11/107 (10.28%) | 14/155 (9.03%)   |
| Sole aneuploidy                                                                  | 16/155 (10.32%)  | 11/107 (10.28%) | 37/266 (13.91%)  | 11/107 (10.28%) | 25/155 (16.13%)  |
| Aneuploidy embryos with mosaic forms                                             | 7/155 (4.52%)    | 2/107 (1.87%)   | 22/266 (8.27%)   | 8/107 (7.48%)   | 7/155 (4.52%)    |
| Aneuploidy embryos with deletion and/or duplication                              | 2/155 (1.29%)    | 2/107 (1.87%)   | 6/266 (2.26%)    | 2/107 (1.87%)   | 5/155 (3.23%)    |
| Aneuploidy embryos with chromosomal deletion and/or duplication and mosaic forms | 3/155 (1.94%)    | 3/107 (2.8%)    | 5/266 (1.88%)    | 1/107 (0.93%)   | 7/155 (4.52%)    |

\*46.45% vs. 28.39%, OR = 2.19 (1.37 - 3.50),  $P < 0.001$ ;

#9.68% vs. 20%, OR = 0.43 (0.22-0.83),  $P = 0.016$

Table 4. PGT-A results and female PN 14 h coefficient  $\beta_1$  ranking.

| PGT-A result                  | First 1        | First 2        | Median          | Last 2         | Last 1         |
|-------------------------------|----------------|----------------|-----------------|----------------|----------------|
| Chromosomal-normal and mosaic | 54/81 (66.67%) | 36/56 (64.29%) | 73/136 (53.68%) | 34/57 (59.65%) | 42/81 (51.85%) |
| Euploid with errors           | 12/81 (14.81%) | 8/56 (14.29%)  | 28/136 (20.59%) | 9/57 (15.79%)  | 18/81 (22.22%) |
| Aneuploid with errors         | 15/81 (18.52%) | 12/56 (21.43%) | 35/136 (25.74%) | 14/57 (24.56%) | 21/81 (25.93%) |

Table 5. PGT-A results (errors stratification) and female PN 14 h coefficient  $\beta_1$  ranking.

| PGT-A result                                                  | First 1        | First 2        | Median          | Last 2         | Last 1         |
|---------------------------------------------------------------|----------------|----------------|-----------------|----------------|----------------|
| Chromosomal-normal                                            | 42/81 (51.85%) | 25/57 (43.86%) | 51/136 (37.5%)  | 30/57 (52.63%) | 28/81 (34.57%) |
| Sole mosaic                                                   | 12/81 (14.81%) | 11/57 (19.3%)  | 22/136 (16.18%) | 4/57 (7.02%)   | 14/81 (17.28%) |
| Sole deletion and/or duplication                              | 7/81 (8.64%)   | 6/57 (10.53%)  | 16/136 (11.76%) | 5/57 (8.77%)   | 13/81 (16.05%) |
| Sole deletion and/or duplication euploidy embryos with mosaic | 6/81 (7.41%)   | 3/57 (5.26%)   | 12/136 (8.82%)  | 4/57 (7.02%)   | 5/81 (6.17%)   |

|                                                                                  |               |               |                 |               |                |
|----------------------------------------------------------------------------------|---------------|---------------|-----------------|---------------|----------------|
| forms                                                                            |               |               |                 |               |                |
| Sole aneuploidy                                                                  | 9/81 (11.11%) | 6/57 (10.53%) | 28/136 (20.59%) | 7/57 (12.28%) | 11/81 (13.58%) |
| Aneuploidy embryos with mosaic forms                                             | 3/81 (3.7%)   | 2/57 (3.51%)  | 5/136 (3.68%)   | 5/57 (8.77%)  | 4/81 (4.94%)   |
| Aneuploidy embryos with deletion and/or duplication                              | 1/81 (1.23%)  | 2/57 (3.51%)  | 2/136 (1.47%)   | 1/57 (1.75%)  | 6/81 (7.41%)   |
| Aneuploidy embryos with chromosomal deletion and/or duplication and mosaic forms | 1/81 (1.23%)  | 2/57 (3.51%)  | 0               | 0             | 0              |

Table 6. PGT-SR results and female PN 14 h coefficient  $\beta$ 1 ranking.

| PGT-SR result                | First 1         | First 2     | Median          | Last 2      | Last 1          |
|------------------------------|-----------------|-------------|-----------------|-------------|-----------------|
| Chromosome-normal and mosaic | 49/74 (66.22%)* | 24/50 (48%) | 60/130 (46.15%) | 21/50 (42%) | 24/74 (32.43%)* |
| Euploid with errors          | 10/74 (13.51%)# | 18/50 (36%) | 35/130 (26.92%) | 21/50 (42%) | 27/74 (36.49%)# |
| Aneuploid with errors        | 15/74 (20.27%)  | 8/50 (16%)  | 35/130 (26.92%) | 8/50 (16%)  | 23/74 (31.08%)  |

\*66.22% vs. 32.43%, OR = 4.08 (2.06–8.10),  $P < 0.001$

#13.51% vs. 36.49%, OR = 0.27 (0.12–0.61),  $P = 0.001$

Table 7. PGT-SR results (errors stratification) and female PN 14 h coefficient  $\beta$ 1 ranking.

| PGT-SR result                                                                    | First 1         | First 2        | Median          | Last 2         | Last 1          |
|----------------------------------------------------------------------------------|-----------------|----------------|-----------------|----------------|-----------------|
| Chromosome-normal                                                                | 30/74 (40.54%)* | 18/50 (36.00%) | 49/130 (37.69%) | 13/50 (26.00%) | 16/74 (21.62%)* |
| Sole mosaic                                                                      | 19/74 (25.68%)# | 6/50 (12.00%)  | 11/130 (8.46%)  | 8/50 (16.00%)  | 8/74 (10.81%)#  |
| Sole deletion and/or duplication                                                 | 8/74 (10.81%)   | 11/50 (22.00%) | 25/130 (19.23%) | 14/50 (28.00%) | 18/74 (24.32%)  |
| Sole deletion and/or duplication euploidy embryos with mosaic forms              | 3/74 (4.05%)    | 9/50 (18.00%)  | 10/130 (7.69%)  | 7/50 (14.00%)  | 9/74 (12.16%)   |
| Sole aneuploidy                                                                  | 7/74 (9.46%)    | 5/50 (10.00%)  | 20/130 (15.38%) | 4/50 (8.00%)   | 14/74 (18.92%)  |
| Aneuploidy embryos with mosaic forms                                             | 4/74 (5.41%)    | 0              | 6/130 (4.62%)   | 3/50 (6.00%)   | 3/74 (4.05%)    |
| Aneuploidy embryos with deletion and/or duplication                              | 1/74 (1.35%)    | 0              | 4/130 (3.08%)   | 0              | 4/74 (5.41%)    |
| Aneuploidy embryos with chromosomal deletion and/or duplication and mosaic forms | 2/74 (2.7%)     | 1/50 (2%)      | 5/130 (3.85%)   | 1/50 (2%)      | 2/74 (2.7%)     |

\*40.54% vs. 21.62%, OR = 2.47 (1.20–5.09),  $P = 0.020$ ;

#25.68% vs. 10.81%, OR = 2.85 (1.16–7.01),  $P = 0.032$ ;

Table 8. PGT-SR (errors from the proband) results by female PN 14 h coefficient  $\beta$ 1 ranking.

| PGT-SR result                                         | First 1        | First 2        | Median         | Last 2         | Last 1          |
|-------------------------------------------------------|----------------|----------------|----------------|----------------|-----------------|
| Chromosomal normal embryo                             | 26/42 (61.9%)* | 10/27 (37.04%) | 32/73 (43.84%) | 12/27 (44.44%) | 10/42 (23.81%)* |
| Embryo's chromosomal error coincident with female     | 12/42 (28.57%) | 13/27 (48.15%) | 28/73 (38.36%) | 10/27 (37.04%) | 21/42 (50%)     |
| Embryo's chromosomal error not coincident with female | 4/42 (9.52%)   | 4/27 (14.81%)  | 13/73 (17.81%) | 5/27 (18.52%)  | 11/42 (26.19%)  |

\*61.9% vs. 23.81%, OR = 5.20 (2.02–13.37),  $P < 0.001$

Table 9. PGT-SR results (errors from the proband) and male PN 14 h coefficient  $\beta$ 1 ranking.

| PGT-SR result                                       | First 1        | First 2        | Median         | Last 2         | Last 1         |
|-----------------------------------------------------|----------------|----------------|----------------|----------------|----------------|
| Chromosomal normal embryo                           | 19/32 (59.38%) | 13/23 (56.52%) | 28/57 (49.12%) | 12/23 (52.17%) | 16/32 (50%)    |
| Embryo's chromosomal error coincident with male     | 9/32 (59.38%)  | 7/23 (30.43%)  | 23/57 (40.35%) | 6/23 (26.09%)  | 6/32 (18.75%)  |
| Embryo's chromosomal error not coincident with male | 4/32 (12.5%)   | 3/23 (13.04%)  | 6/57 (10.53%)  | 5/23 (21.74%)  | 10/32 (31.25%) |

Table 10. The female PN and total DNA content.

| Rank | 0               | DNA increase    | decrease        |     |
|------|-----------------|-----------------|-----------------|-----|
| 1    | 89/155 (57.42%) | 32/155 (20.64%) | 33/155 (21.29%) | 155 |
| 2    | 79/155 (50.97%) | 40/155 (25.81%) | 36/155 (23.23%) | 155 |
| 3    | 78/138 (56.52%) | 39/138 (28.26%) | 21/138 (15.22%) | 138 |
| 4    | 46/107 (42.99%) | 25/107 (23.36%) | 36/107 (33.64%) | 107 |
| 5    | 40/81 (49.38%)  | 21/81 (25.93%)  | 20/81 (24.69%)  | 81  |
| 6    | 33/56 (58.93%)  | 12/56 (21.43%)  | 11/56 (19.64%)  | 56  |
| 7    | 23/37 (62.16%)  | 9/37 (24.32%)   | 5/37 (13.51%)   | 37  |
| 8    | 13/25 (52.00%)  | 8/25 (32.00%)   | 4/25 (16.00%)   | 25  |
| 9    | 8/13 (61.54%)   | 4/13 (30.77%)   | 1/13 (7.69%)    | 13  |
| 10   | 6/12 (50.00%)   | 3/12 (25.00%)   | 3/12 (25.00%)   | 12  |
| >10  | 2/11 (18.18%)   | 5/11 (45.45%)   | 4/11 (36.36%)   | 11  |
|      | 417             | 199             | 174             | 790 |

Correlation analysis:  $P = 0.491$

## Supplement

Fig. 1. The heterogeneity of female pronucleus area coefficient  $\beta_1$

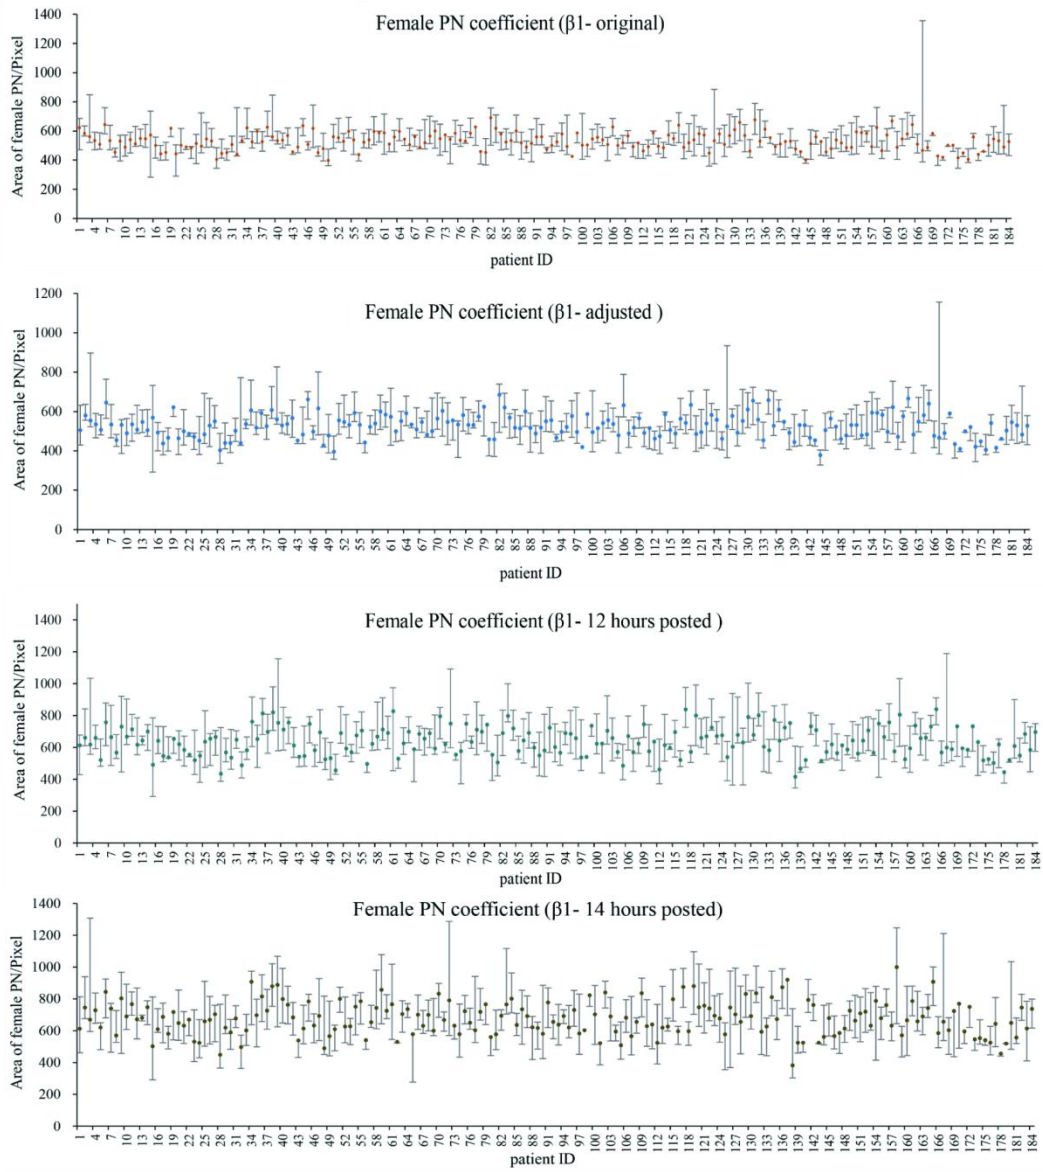

Supplement

Fig. 2. The definition of ranking by PN coefficient  $\beta_1$ .

| Number of embryo | Ranking by PN coefficient $\beta_1$ |   |   |   |   |   |   |   |   |    |    |  |
|------------------|-------------------------------------|---|---|---|---|---|---|---|---|----|----|--|
| 2                | 1                                   | 2 |   |   |   |   |   |   |   |    |    |  |
| 3                | 1                                   | 2 | 3 |   |   |   |   |   |   |    |    |  |
| 4                | 1                                   | 2 | 3 | 4 |   |   |   |   |   |    |    |  |
| 5                | 1                                   | 2 | 3 | 4 | 5 |   |   |   |   |    |    |  |
| 6                | 1                                   | 2 | 3 | 4 | 5 | 6 |   |   |   |    |    |  |
| 7                | 1                                   | 2 | 3 | 4 | 5 | 6 | 7 |   |   |    |    |  |
| 8                | 1                                   | 2 | 3 | 4 | 5 | 6 | 7 | 8 |   |    |    |  |
| 9                | 1                                   | 2 | 3 | 4 | 5 | 6 | 7 | 8 | 9 |    |    |  |
| 10               | 1                                   | 2 | 3 | 4 | 5 | 6 | 7 | 8 | 9 | 10 |    |  |
| 11               | 1                                   | 2 | 3 | 4 | 5 | 6 | 7 | 8 | 9 | 10 | 11 |  |

Fig. 3. Chromosome-normal rate in a female age-dependent distribution.

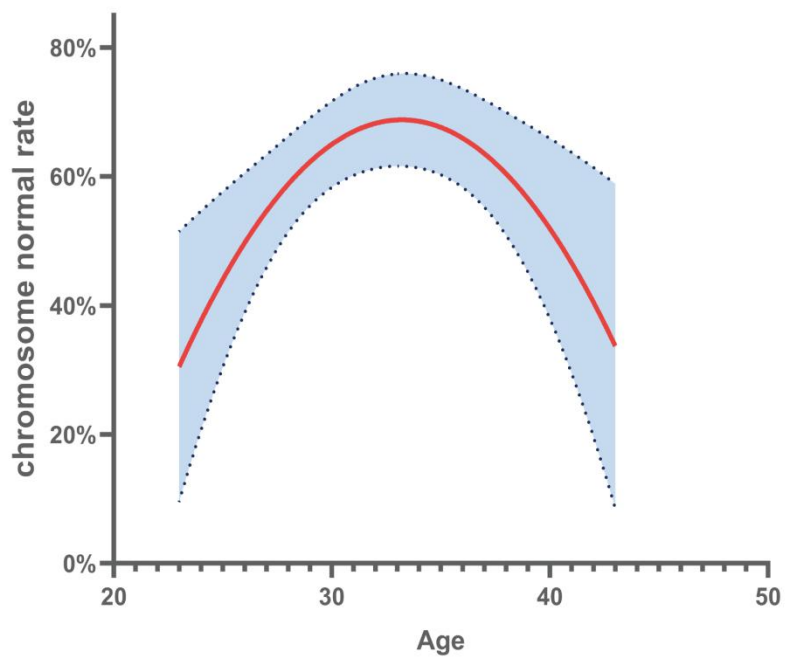

Supplement: Supplementary file [file media-1.pdf]
